# Supplementary material
Source: MDPI journal article supplement (https://www.mdpi.com/search?q=ijms-19-03179)

1 **Supplementary Materials**

2 **Synthesis and *in vitro* antitumor activity of novel bivalent  $\beta$ -carboline derivatives**  
3 **with DNA as a potential target**

4 Hongling Gu<sup>1</sup>, Na Li<sup>1</sup>, Jiangkun Dai<sup>1</sup>, Yaxi Xi<sup>1</sup>, Shijun Wang<sup>1</sup>, Junru Wang<sup>1,2,\*</sup>

5 <sup>1</sup> Shaanxi Key Laboratory of Natural Products & Chemical Biology, College of  
6 Chemistry and Pharmacy, Northwest A&F University, No. 22 Xinong Road, Yangling,  
7 Shaanxi 712100, China; honglingguw@163.com; lnuk@nwsuaf.edu.cn;

8 daijkun@hotmail.com; mysteryxi@163.com; 444795415@nwafu.edu.cn;

9 <sup>2</sup> State key Laboratory of Drug Research, Shanghai Institute of Materia Medica,  
10 Chinese Academy of Sciences, 555 Zu Chong Zhi Road, Zhangjiang Hi-Tech Park,  
11 201203, Shanghai, China.

12 \* Corresponding authors:

13 Junru Wang, Ph.D

14 College of Chemistry and Pharmacy, Northwest A&F University, No. 22 Xinong  
15 Road, Yangling, Shaanxi 712100, China.

16 State key Laboratory of Drug Research, Shanghai Institute of Materia Medica,  
17 Chinese Academy of Sciences, 555 Zu Chong Zhi Road, Zhangjiang Hi-Tech Park,  
18 201203, Shanghai, China.

19 Email addresses: wangjunru@nwafu.edu.cn

21 **S.1. General reaction of synthesis of  $\beta$ -carboline monomers (4A, 4B, 4C, and 4D)**

22 L-tryptophan (10 g, 49 mmol) was dissolved in ultrapure water (450 mL). And  
23 the sulfuric acid (0.1 mol/L) was added dropwise with stirring until the solution  
24 became clear. And then 11 mL 37% formaldehyde solution was added and the mixture  
25 was reacted at room temperature for about 5 h. Then, the pH of the reaction solution  
26 was adjusted to about 6 with the saturated NaHCO<sub>3</sub> solution to obtain a white  
27 precipitate, and the precipitate was collected by negative-pressure filtration and  
28 washed well with water and then dried to obtain the target product **1** (1, 2, 3,  
29 4-tetrahydro- $\beta$ -carboline-3-carboxylic acid). The yield was about 70% (7.23 g).

30 The target product **1** (1, 2, 3, 4-tetrahydro- $\beta$ -carboline-3-carboxylic acid) (500  
31 mg, 2.3 mmol) was dissolved in dried ethanol (20 mL), and thionyl chloride (1 mL)  
32 was added under an ice bath. The mixture was refluxed for 15 h and then the pH was  
33 adjusted to 8. After extraction with ethyl acetate and purification by column  
34 chromatography (PE: EA = 1: 1), the target product **2** (1, 2, 3, 4-tetrahydro-  
35  $\beta$ -carboline-3-carboxylic acid methyl ester) was obtained. The yield was about 63.7%  
36 (339 mg).

37 The target product **2** (1, 2, 3, 4-tetrahydro- $\beta$ -carboline-3-carboxylic acid methyl  
38 ester) (3 g, 13 mmol) was dissolved in xylene with Pd/C (5%) as a catalyst. And the  
39 mixture was refluxed for 48 h, then filtered and distilled under negative-pressure.  
40 After separation and purification by column chromatography (DCM: EA = 5: 1), the  
41 target product **3** ( $\beta$ -carboline-3-carboxylic acid methyl ester) was obtain. The yield  
42 was about 81.8% (2.45 g).

43 The target product **3** ( $\beta$ -carboline-3-carboxylic acid methyl ester) (300 mg, 1.33  
44 mmol) was dissolved in DMF with NaH as reducer. Then, benzyl bromide was added  
45 and the mixture was reacted at room temperature for 6 h. After completion of the  
46 reaction as indicated by TLC, the reaction was quenched with ice water, and then  
47 extracted with ethyl acetate, washed well with saturated NaCl and then dried with  
48 anhydrous Na<sub>2</sub>SO<sub>4</sub>. After separation and purification by column chromatography  
49 (DCM: EA = 2: 1), the target product **4A** (9-benzyl- $\beta$ -carboline-3-carboxylic acid  
50 methyl ester) was obtained. The yield was about 80.4% (313.6 mg).

51 According to the above method, the target product **3** was reacted with  
52 *o*-methylbenzyl chloride, *p*-methylbenzyl chloride and *o*-fluorobenzyl chloride,  
53 respectively, to obtain monomers 9-*o*-methylbenzyl- $\beta$ -carboline-3-carboxylic acid  
54 methyl ester (**4B**), 9-*p*-methylbenzyl- $\beta$ -carboline-3-carboxylic acid methyl ester (**4C**),  
55 and 9-*o*-fluorobenzyl- $\beta$ -carboline-3-carboxylic acid methyl ester (**4D**).

56

57 **S.2. General reaction of synthesis of  $\beta$ -carboline dimers (6a-6f, 6g-6l, 6m-6r, and**  
58 **6s-6x)**

59 Taking the synthesis of the dimer **6a** as an example: **4A**  
60 (9-benzyl- $\beta$ -carboline-3-carboxylic acid methyl ester) (300 mg, 0.95 mmol) was  
61 dissolved in THF/CH<sub>3</sub>OH. And then the NaOH solution (0.1 mol/L, 38 mL) was  
62 added to give a white precipitate. The mixture was reacted at room temperature until  
63 the solution became clear (about 24 h). The reaction solution was extracted with ethyl  
64 acetate and dichloromethane. The pH of resulting aqueous phase was adjusted to 5 to  
65 give the target product **5** (9-benzyl- $\beta$ -carboline-3-carboxylic acid).

66 The target product **5** (60 mg, 0.2 mmol) was dissolved in DMF. And K<sub>2</sub>CO<sub>3</sub> (41  
67 mg, 0.3 mmol) and 1, 3-dibromopropane (10  $\mu$ L, 0.1 mmol) were sequentially added,  
68 and the mixture was reacted for about 14 h. The mixture was quenched with ice water,  
69 and then extracted with dichloromethane, washed with saturated NaCl and dried with  
70 anhydrous Na<sub>2</sub>SO<sub>4</sub>. After separation and purification by column chromatography  
71 (DCM: EA = 5: 1), the target product **6a** (propane-1,3-diyl-bis-(9-benzyl-9H-pyrido  
72 [3,4-b]indole-3-carboxylate)) was obtained.

73 Following the same method, 9-benzyl- $\beta$ -carboline-3-carboxylic acid methyl ester  
74 was reacted with dibromobutane, dibromopentane, dibromohexane, dibromooctane,  
75 and dibromoxylene, respectively, to give  $\beta$ -carboline-3-carboxylic acid dimers  
76 (**6b-6f**).

77 Following the same method, 9-*o*-methylbenzyl- $\beta$ -carboline-3-carboxylic acid  
78 methyl ester was reacted with dibromopropane, dibromobutane, dibromopentane,

79 dibromohexane, dibromooctane, and dibromoxylene, respectively, to give different  
80  $\beta$ -carboline-3-carboxylic acid dimers (**6g-6l**).

81 Following the same method, 9-*p*-methylbenzyl- $\beta$ -carboline-3-carboxylic acid  
82 methyl ester was reacted with dibromopropane, dibromobutane, dibromopentane,  
83 dibromohexane, dibromooctane, and dibromoxylene, respectively, to give different  
84  $\beta$ -carboline-3-carboxylic acid dimers (**6m-6r**).

85 Following the same method, 9-*o*-fluorobenzyl- $\beta$ -carboline-3-carboxylic acid  
86 methyl ester was reacted with dibromopropane, dibromobutane, dibromopentane,  
87 dibromohexane, dibromooctane, and dibromoxylene, respectively, to give different  
88  $\beta$ -carboline-3-carboxylic acid dimers (**6s-6x**).

89

90 **S.3.** The data of yield, melting point, nuclear magnetic and mass spectral

91 **4A** (9-benzyl- $\beta$ -carboline-3-carboxylic acid methyl ester):

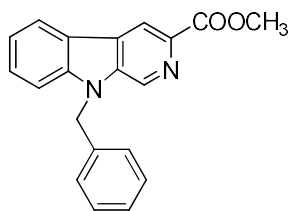

92

93 White crystal, yield: 80.4%, m.p.: 186-187 °C. ESI-MS, m / z: 317.20 [M+H]<sup>+</sup>.

94 <sup>1</sup>H-NMR (500 MHz, CDCl<sub>3</sub>)  $\delta$  8.95–8.89 (m, 2H), 8.23 (d,  $J$  = 7.9 Hz, 1H), 7.61 (t,  $J$

95 = 7.7 Hz, 1H), 7.49 (d,  $J$  = 8.3 Hz, 1H), 7.39 (d,  $J$  = 7.4 Hz, 1H), 7.27 (d,  $J$  = 6.0 Hz,

96 3H), 7.15 (d,  $J$  = 7.4 Hz, 2H), 5.62 (s, 2H), 4.06 (s, 3H). <sup>13</sup>C-NMR (126 MHz, CDCl<sub>3</sub>)

97  $\delta$  166.47, 141.84, 138.00, 137.55, 135.71, 131.81, 129.22, 129.06, 128.86, 128.12,

98 126.54, 122.20, 121.51, 121.08, 117.80, 110.25, 52.72, 47.30.

99 **4B** (9-*o*-methylbenzyl- $\beta$ -carboline-3-carboxylic acid methyl ester):

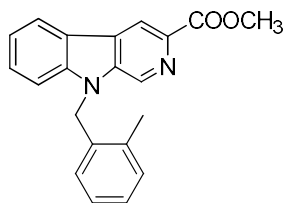

100

101 White crystal, yield: 64.7%, m.p.: 147-148 °C. ESI-MS, m / z: 331.32 [M+H]<sup>+</sup>.

102 <sup>1</sup>H-NMR (500 MHz, CDCl<sub>3</sub>)  $\delta$  8.94 (s, 1H), 8.78 (s, 1H), 8.26 (d,  $J$  = 7.8 Hz, 1H),

103 7.60 (t,  $J$  = 7.4 Hz, 1H), 7.44–7.35 (m, 2H), 7.27–7.22 (m, 1H), 7.19 (t,  $J$  = 7.4 Hz,

104 1H), 6.99 (t,  $J$  = 7.5 Hz, 1H), 6.57 (d,  $J$  = 7.7 Hz, 1H), 5.58 (s, 2H), 4.06 (s, 3H), 2.42

105 (s, 3H). <sup>13</sup>C-NMR (126 MHz, CDCl<sub>3</sub>)  $\delta$  166.48, 141.98, 138.16, 137.53, 135.28,

106 133.32, 131.86, 130.80, 129.23, 128.87, 127.99, 126.59, 125.90, 122.20, 121.48,

107 121.11, 117.81, 110.32, 52.73, 45.55, 19.37.

108 **4C** (9-*p*-methylbenzyl- $\beta$ -carboline-3-carboxylic acid methyl ester):

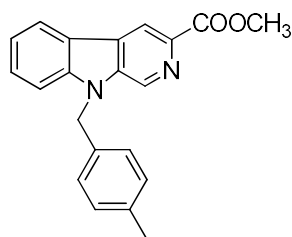

109

110 White crystal, yield: 58.9%, m.p.: 157-158 °C. ESI-MS, m / z: 331.29 [M+H]<sup>+</sup>.

111 <sup>1</sup>H-NMR (500 MHz, CDCl<sub>3</sub>) δ 8.93 (d, J = 2.2 Hz, 2H), 8.24 (d, J = 7.9 Hz, 1H),

112 7.66–7.59 (m, 1H), 7.51 (d, J = 8.4 Hz, 1H), 7.42–7.35 (m, 1H), 7.26 (s, 1H), 7.07 (q,

113 J = 8.2 Hz, 4H), 5.59 (s, 2H), 4.06 (s, 3H), 2.29 (s, 3H). <sup>13</sup>C-NMR (126 MHz, CDCl<sub>3</sub>)

114 δ 166.35, 141.93, 137.97, 137.23, 132.62, 131.74, 129.72, 129.27, 128.95, 126.57,

115 122.21, 121.49, 121.08, 117.83, 110.33, 52.75, 47.17, 21.06.

116 **4D** (9-*o*-fluorobenzyl-β-carboline-3-carboxylic acid methyl ester):

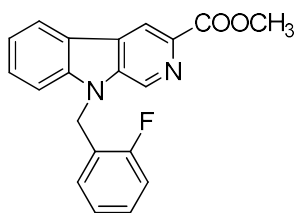

117

118 White crystal, yield: 68.3%, m.p.: 175 - 177 °C. ESI-MS, m / z: 335.30 [M+H]<sup>+</sup>.

119 <sup>1</sup>H-NMR (500 MHz, CDCl<sub>3</sub>) δ 9.00 (s, 1H), 8.93 (s, 1H), 8.24 (d, J = 7.9 Hz, 1H),

120 7.67 - 7.62 (m, 1H), 7.56 (d, J = 8.3 Hz, 1H), 7.40 (t, J = 7.5 Hz, 1H), 7.28 - 7.23 (m,

121 1H), 7.15 - 7.08 (m, 1H), 7.00 - 6.94 (m, 1H), 6.91 - 6.85 (m, 1H), 5.68 (s, 2H), 4.07

122 (s, 3H).

123 **6a** propane-1,3-diyl-bis-(9-benzyl-9H-pyrido[3,4-b]indole-3-carboxylate)

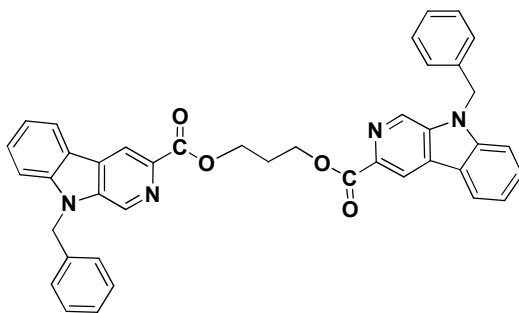

124

125 White flake, yield: 57.2%, m.p.: 182-183 °C. ESI-MS, m / z: 645.38 [M+H]<sup>+</sup>.

126 <sup>1</sup>H-NMR (500 MHz, CDCl<sub>3</sub>) δ 8.82 (dd, J = 11.7, 0.7 Hz, 2H), 8.17 (d, J = 7.8 Hz, 1H),

127 7.61 (ddd, J = 8.2, 7.3, 1.1 Hz, 1H), 7.46 (d, J = 8.3 Hz, 1H), 7.36 (t, J = 7.5 Hz, 1H),

128 7.26 (d, J = 6.4 Hz, 3H), 7.10 (dd, J = 7.0, 2.4 Hz, 2H), 5.46 (s, 2H), 4.72 (t, J = 6.2

129 Hz, 2H), 2.50–2.44 (m, 1H). <sup>13</sup>C-NMR (126 MHz, CDCl<sub>3</sub>) δ 165.97, 141.69, 137.87,

130 137.80, 135.75, 132.04, 129.05, 129.00, 128.52, 128.09, 126.52, 122.22, 121.52,

131 120.91, 117.76, 110.09, 62.81, 47.11, 28.51.

132 **6b** butane-1,4-diyloxy-bis-(9-benzyl-9H-pyrido[3,4-*b*]indole-3-carboxylate)

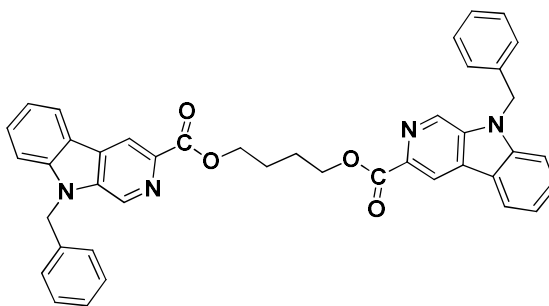

133

134 White flake, yield: 56.7%, m.p.: 210-212 °C. ESI-MS, m / z: 659.40 [M+H]<sup>+</sup>.

135 <sup>1</sup>H-NMR (500 MHz, CDCl<sub>3</sub>) δ 8.89 (d, J = 3.6 Hz, 2H), 8.22 (d, J = 7.8 Hz, 1H), 7.59

136 (t, J = 7.4 Hz, 1H), 7.48 (d, J = 8.3 Hz, 1H), 7.35 (t, J = 7.5 Hz, 1H), 7.24 (s, 3H), 7.15

137 – 7.10 (m, 2H), 5.60 (s, 2H), 4.56 (s, 2H), 2.08 (s, 2H). <sup>13</sup>C-NMR (126 MHz, CDCl<sub>3</sub>)

138 δ 166.10, 143.16, 141.86, 138.03, 135.84, 134.33, 132.12, 129.06, 128.74, 128.10,

139 126.58, 122.23, 121.67, 120.96, 117.71, 110.16, 65.10, 47.32, 25.71.



140 **6c** pentane-1,5-diyl-bis-(9-benzyl-9H-pyrido[3,4-*b*]indole-3-carboxylate)

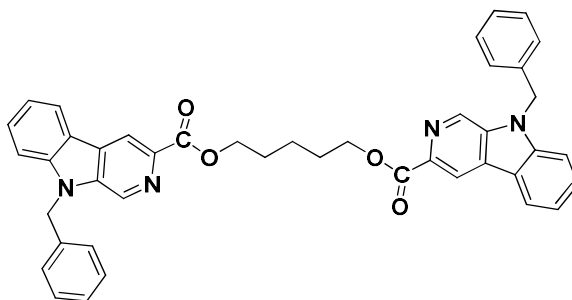

141

142 White flake, yield: 77.5%, m.p.: 183-184 °C. ESI-MS, m / z: 673.45 [M+H]<sup>+</sup>.

143 <sup>1</sup>H-NMR (500 MHz, CDCl<sub>3</sub>) δ 8.92–8.86 (m, 2H), 8.21 (d, J = 7.9 Hz, 1H),

144 7.63–7.56 (m, 1H), 7.48 (d, J = 8.3 Hz, 1H), 7.38–7.32 (m, 1H), 7.26–7.25 (m, 3H),

145 7.13 (dd, J = 7.2, 2.1 Hz, 2H), 5.58 (s, 2H), 4.51 (t, J = 6.8 Hz, 2H), 2.03–1.95 (m,

146 2H), 1.70 (dt, J = 15.5, 7.7 Hz, 1H). <sup>13</sup>C-NMR (126 MHz, CDCl<sub>3</sub>) δ 166.15, 141.84,

147 138.19, 138.01, 135.85, 132.11, 129.08, 129.03, 128.75, 128.12, 126.60, 122.23,

148 121.66, 120.95, 117.68, 110.15, 65.38, 47.31, 28.65, 22.67.

149 **6d** hexane-1,6-diyl-bis-(9-benzyl-9H-pyrido[3,4-*b*]indole-3-carboxylate)

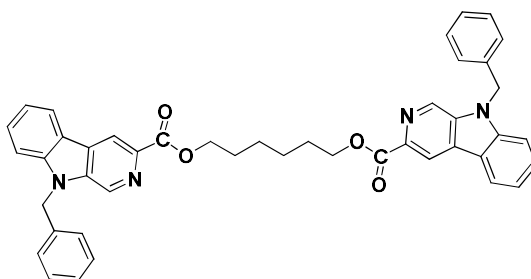

150

151 White powder, yield: 71%, m.p.: 184-185 °C. ESI-MS, m / z: 687.41 [M+H]<sup>+</sup>.

152 <sup>1</sup>H-NMR (500 MHz, CDCl<sub>3</sub>) δ 8.89 (d, J = 10.8 Hz, 2H), 8.23 (d, J = 7.8 Hz, 1H),

153 7.63–7.58 (m, 1H), 7.49 (d, J = 8.3 Hz, 1H), 7.36 (t, J = 7.4 Hz, 1H), 7.29–7.24 (m,

154 3H), 7.17–7.11 (m, 2H), 5.60 (s, 2H), 4.48 (t, J = 6.8 Hz, 2H), 1.97–1.87 (m, 2H),

155 1.60 (dd, J = 8.7, 5.4 Hz, 2H). <sup>13</sup>C-NMR (126 MHz, CDCl<sub>3</sub>) δ 166.20, 141.82, 138.18,

156 137.99, 135.85, 132.10, 129.07, 129.04, 128.73, 128.11, 126.59, 122.23, 121.63,  
157 120.95, 117.68, 110.16, 65.58, 47.29, 28.85, 25.87.

158 **6e** octane-1,8-diyl-bis-(9-benzyl-9H-pyrido[3,4-*b*]indole-3-carboxylate)

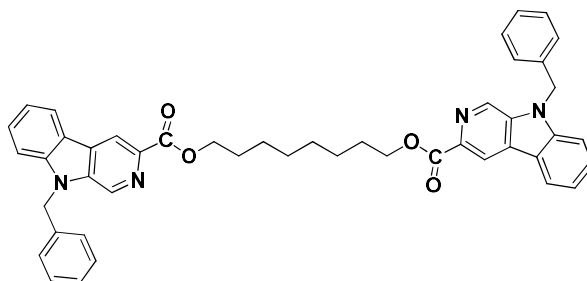

159

160 White powder, yield: 57.1%, m.p.: 198-199 °C. ESI-MS, m / z: 715.49 [M+H]<sup>+</sup>.

161 <sup>1</sup>H-NMR (500 MHz, CDCl<sub>3</sub>) δ 8.90 (d, J = 14.0 Hz, 2H), 8.23 (d, J = 7.8 Hz, 1H),

162 7.60 (t, J = 7.5 Hz, 1H), 7.49 (d, J = 8.3 Hz, 1H), 7.37 (t, J = 7.5 Hz, 1H), 7.29–7.21

163 (m, 3H), 7.17–7.11 (m, 2H), 5.61 (s, 2H), 4.46 (t, J = 6.9 Hz, 2H), 1.93 – 1.83 (m, 2H),

164 1.46 (dd, J = 26.7, 6.3 Hz, 4H). <sup>13</sup>C-NMR (126 MHz, CDCl<sub>3</sub>) δ 166.20, 141.83,

165 138.21, 137.98, 135.85, 133.96, 132.09, 129.06, 128.73, 128.10, 126.59, 122.19,

166 121.63, 120.95, 117.66, 110.17, 65.72, 47.29, 29.24, 28.87, 25.96.

167 **6f** 1,4-phenylene-bis-(methylene)-bis-(9-benzyl-9H-pyrido [3,4-*b*]indole-3-carbo-  
168 xylate)

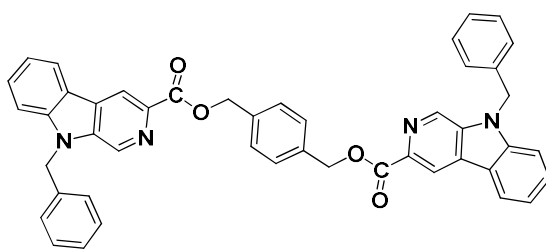

169

170 White flake, yield: 53.1%, m.p.: 292-294 °C. ESI-MS, m / z: 707.22 [M+H]<sup>+</sup>.

171 <sup>1</sup>H-NMR (500 MHz, CDCl<sub>3</sub>) δ 8.91 (d, J = 8.9 Hz, 2H), 8.23 (d, J = 7.8 Hz, 1H), 7.61

172 (t, J = 7.7 Hz, 1H), 7.57 (s, 2H), 7.49 (d, J = 8.3 Hz, 1H), 7.36 (t, J = 7.5 Hz, 1H), 7.26

173 (s, 3H), 7.17–7.11 (m, 2H), 5.63 (s, 2H), 5.51 (s, 2H). <sup>13</sup>C-NMR (126 MHz, CDCl<sub>3</sub>) δ

174 165.90, 141.82, 138.06, 137.78, 136.28, 135.79, 132.18, 129.07, 128.86, 128.71,  
175 128.11, 126.56, 122.24, 121.61, 121.01, 117.96, 110.20, 66.90, 47.31, 29.71.

176 **6g** propane-1,3-diyl-bis-(9-(2-methylbenzyl)-9H-pyrido[3,4-*b*]indole-3-carboxylate)

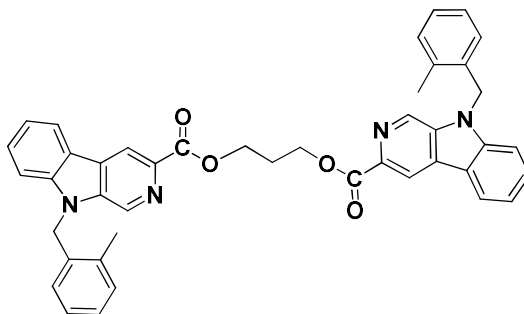

177

178 White flake, yield: 57.7%, m.p.: 157-158 °C. ESI-MS, m / z: 673.43 [M+H]<sup>+</sup>.

179 <sup>1</sup>H-NMR (500 MHz, CDCl<sub>3</sub>) δ 8.77 (s, 1H), 8.65 (s, 1H), 8.18 (d, J = 7.9 Hz, 1H),

180 7.59 (t, J = 7.7 Hz, 1H), 7.36 (dd, J = 18.8, 8.0 Hz, 2H), 7.26 (s, 1H), 7.21 (d, J = 7.5

181 Hz, 1H), 7.16 (t, J = 7.4 Hz, 1H), 6.95 (t, J = 7.5 Hz, 1H), 6.48 (d, J = 7.7 Hz, 1H),

182 5.32 (s, 2H), 4.72 (t, J = 5.9 Hz, 2H), 2.51–2.42 (m, 1H), 2.37 (s, 3H). <sup>13</sup>C-NMR (126

183 MHz, CDCl<sub>3</sub>) δ 165.96, 141.77, 137.93, 137.82, 135.18, 133.36, 132.08, 130.75,

184 128.97, 128.41, 127.93, 126.59, 125.84, 122.26, 121.48, 120.92, 117.71, 110.12,

185 62.95, 45.22, 28.50, 19.36.

186 **6h** butane-1,4-diyl-bis-(9-(2-methylbenzyl)-9H-pyrido[3,4-*b*]indole-3-carboxylate)

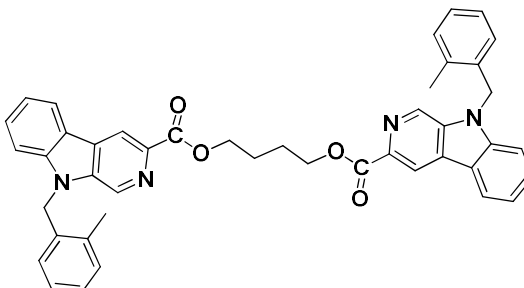

187

188 White flake, yield: 44.2%, m.p.: 211-213 °C. ESI-MS m / z: 687.40 [M+H]<sup>+</sup>. <sup>1</sup>H

189 NMR (500 MHz, CDCl<sub>3</sub>) δ 8.96 (d, J = 0.7 Hz, 1H), 8.82 (d, J = 0.5 Hz, 1H), 8.30 (d,

190  $J = 7.8$  Hz, 1H), 7.67–7.60 (m, 1H), 7.46–7.39 (m, 2H), 7.31 (s, 1H), 7.27 (d,  $J = 7.4$   
191 Hz, 1H), 7.22 (t,  $J = 7.4$  Hz, 1H), 7.03 (t,  $J = 7.4$  Hz, 1H), 6.62 (d,  $J = 7.7$  Hz, 1H),  
192 5.61 (s, 2H), 4.62 (s, 2H), 2.45 (s, 3H), 2.14 (t,  $J = 2.7$  Hz, 2H).  $^{13}\text{C}$  NMR (126 MHz,  
193  $\text{CDCl}_3$ )  $\delta$  166.12, 141.94, 138.15, 137.99, 135.28, 133.43, 132.18, 130.78, 129.05,  
194 128.70, 127.96, 126.61, 125.99, 122.24, 121.58, 120.99, 117.76, 110.24, 65.12, 45.51,  
195 25.69, 19.37.

196 **6i** pentane-1,5-diyl-bis-(9-(2-methylbenzyl)-9H-pyrido[3,4-*b*]indole-3-carboxylate)

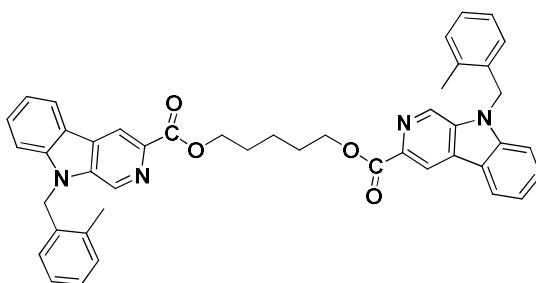

197  
198 White flake, yield: 37.9%, m.p.: 145–146 °C. ESI-MS  $m/z$ : 701.57  $[\text{M}+\text{H}]^+$ .  $^1\text{H}$   
199 NMR (500 MHz,  $\text{CDCl}_3$ )  $\delta$  8.93 (d,  $J = 0.6$  Hz, 1H), 8.80 (d,  $J = 0.4$  Hz, 1H), 8.27 (d,  
200  $J = 7.8$  Hz, 1H), 7.66–7.59 (m, 1H), 7.41 (dd,  $J = 15.6, 7.8$  Hz, 2H), 7.31 (s, 1H), 7.27  
201 (d,  $J = 7.4$  Hz, 1H), 7.22 (t,  $J = 7.4$  Hz, 1H), 7.02 (t,  $J = 7.4$  Hz, 1H), 6.61 (d,  $J = 7.7$   
202 Hz, 1H), 5.57 (s, 2H), 4.56 (t,  $J = 6.8$  Hz, 2H), 2.45 (s, 3H), 2.08–1.99 (m, 2H),  
203 1.78–1.72 (m, 1H).  $^{13}\text{C}$  NMR (126 MHz,  $\text{CDCl}_3$ )  $\delta$  166.15, 141.91, 138.10, 138.07,  
204 135.27, 133.43, 132.16, 130.78, 129.01, 128.67, 127.96, 126.60, 125.99, 122.21,  
205 121.56, 120.95, 117.68, 110.19, 65.36, 45.47, 28.61, 22.61, 19.36.

206 **6j** hexane-1,6-diyl-bis-(9-(2-methylbenzyl)-9H-pyrido[3,4-*b*]indole-3-carboxylate)

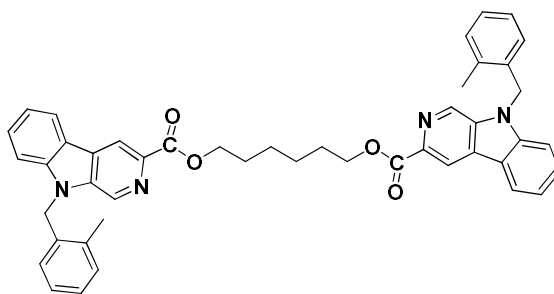

207

208 White powder, yield: 32.6%, m.p.: 189-190 °C. ESI-MS  $m/z$ : 715.55  $[M+H]^+$ .

209  $^1\text{H}$  NMR (500 MHz,  $\text{CDCl}_3$ )  $\delta$  8.90 (d,  $J = 0.8$  Hz, 1H), 8.77 (d,  $J = 0.7$  Hz, 1H), 8.25

210 (d,  $J = 7.8$  Hz, 1H), 7.59 (ddd,  $J = 8.2, 7.2, 1.1$  Hz, 1H), 7.42–7.34 (m, 2H), 7.26 (s,

211 1H), 7.23 (d,  $J = 7.4$  Hz, 1H), 7.18 (t,  $J = 7.4$  Hz, 1H), 6.98 (t,  $J = 7.4$  Hz, 1H), 6.58

212 (d,  $J = 7.7$  Hz, 1H), 5.57 (s, 2H), 4.48 (t,  $J = 6.8$  Hz, 2H), 2.41 (s, 3H), 1.96–1.88 (m,

213 2H).  $^{13}\text{C}$  NMR (126 MHz,  $\text{CDCl}_3$ )  $\delta$  166.20, 141.94, 138.13, 135.29, 133.45, 132.16,

214 130.78, 129.04, 128.71, 127.96, 126.60, 126.00, 122.22, 121.59, 120.97, 117.68,

215 110.22, 65.58, 45.50, 28.84, 25.86, 19.37.

216 **6k** octane-1,8-diyl-bis-(9-(2-methylbenzyl)-9H-pyrido[3,4-*b*]indole-3-carboxylate)

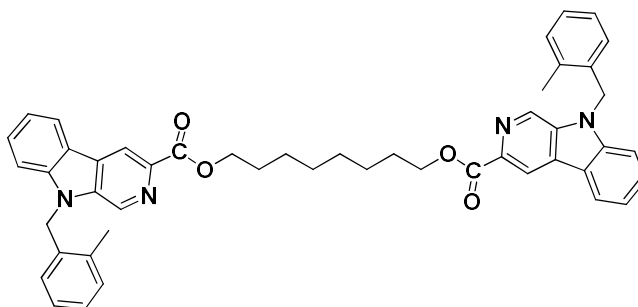

217

218 White powder, yield: 25.2%, m.p.: 223-225 °C. ESI-MS  $m/z$ : 743.62  $[M+H]^+$ .

219  $^1\text{H}$  NMR (500 MHz,  $\text{CDCl}_3$ )  $\delta$  8.90 (s, 1H), 8.78 (s, 1H), 8.26 (d,  $J = 7.8$  Hz, 1H),

220 7.59 (t,  $J = 7.7$  Hz, 1H), 7.42–7.35 (m, 2H), 7.26 (s, 1H), 7.23 (d,  $J = 7.5$  Hz, 1H),

221 7.18 (t,  $J = 7.3$  Hz, 1H), 6.98 (t,  $J = 7.5$  Hz, 1H), 6.58 (d,  $J = 7.7$  Hz, 1H), 5.58 (s, 2H),

222 4.46 (t,  $J = 6.9$  Hz, 2H), 2.41 (s, 3H), 1.92–1.83 (m, 2H), 1.47 (dd,  $J = 32.5, 6.2$  Hz,

223 4H).  $^{13}\text{C}$  NMR (126 MHz,  $\text{CDCl}_3$ )  $\delta$  166.22, 141.95, 138.18, 138.13, 135.29, 133.46,

224 132.16, 130.78, 129.04, 128.72, 127.96, 126.60, 126.00, 122.19, 121.58, 120.97,  
225 117.67, 110.23, 65.72, 45.52, 29.24, 28.87, 25.96, 19.37.

226 **6l** 1,4-phenylene-bis-(methylene)-bis-(9-(2-methylbenzyl)-9H-pyrido[3,4-*b*]indole-3-  
227 carboxylate)

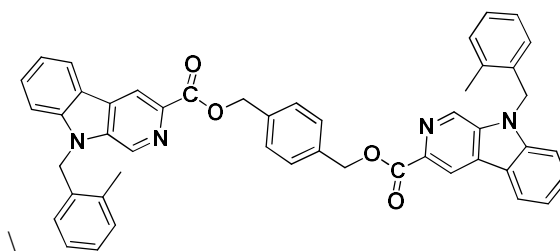

228

229 White flake, yield: 59.2%, m.p.: 280-281 °C. ESI-MS *m/z*: 735.29 [M+H]<sup>+</sup>. <sup>1</sup>H  
230 NMR (500 MHz, CDCl<sub>3</sub>) δ 8.97 (s, 1H), 8.84 (s, 1H), 8.29 (d, *J* = 7.9 Hz, 1H), 7.61 (s,  
231 2H), 7.42 (dd, *J* = 16.1, 8.0 Hz, 2H), 7.31 (s, 3H), 7.28 (d, *J* = 7.5 Hz, 1H), 7.22 (t, *J* =  
232 7.4 Hz, 1H), 7.03 (t, *J* = 7.5 Hz, 1H), 6.62 (d, *J* = 7.7 Hz, 1H), 5.64 (s, 2H), 5.56 (s,  
233 2H), 2.46 (s, 3H). <sup>13</sup>C NMR (126 MHz, CDCl<sub>3</sub>) δ 165.91, 141.95, 138.21, 137.77,  
234 136.29, 135.29, 133.41, 132.26, 130.79, 129.08, 128.86, 128.70, 127.98, 126.61,  
235 125.98, 122.23, 121.57, 121.02, 117.96, 110.26, 66.89, 45.54, 19.37.

236 **6m** propane-1,3-diyl-bis-(9-(4-methylbenzyl)-9H-pyrido[3,4-*b*]indole-3-carboxylate)

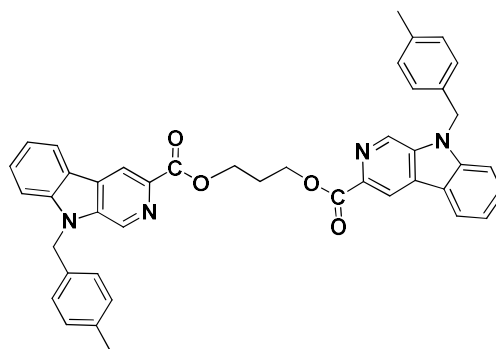

237

238 White flake, yield: 62%, m.p.: 188-189 °C. ESI-MS *m/z*: 673.45 [M+H]<sup>+</sup>. <sup>1</sup>H  
239 NMR (500 MHz, CDCl<sub>3</sub>) δ 8.93 (s, 1H), 8.85 (s, 1H), 8.21 (d, *J* = 7.8 Hz, 1H), 7.66 (t,

240  $J = 7.6$  Hz, 1H), 7.51 (d,  $J = 8.3$  Hz, 1H), 7.40 (t,  $J = 7.3$  Hz, 1H), 7.31 (s, 1H), 7.10  
241 (d,  $J = 8.0$  Hz, 2H), 7.04 (d,  $J = 8.0$  Hz, 2H), 5.46 (s, 2H), 4.77 (t,  $J = 6.2$  Hz, 2H),  
242 2.55–2.49 (m, 1H), 2.31 (s, 3H).  $^{13}\text{C}$  NMR (126 MHz,  $\text{CDCl}_3$ )  $\delta$  165.51, 141.86,  
243 137.94, 137.73, 136.95, 132.55, 131.69, 129.69, 129.23, 128.78, 126.54, 122.27,  
244 121.38, 121.02, 117.83, 110.23, 62.94, 46.99, 28.42, 21.05.

245 **6n** butane-1,4-diyl-bis-(9-(4-methylbenzyl)-9H-pyrido[3,4-*b*]indole-3-carboxylate)

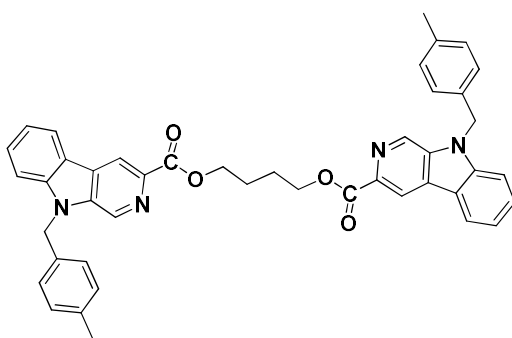

246

247 White flake, yield: 47%, m.p.: 223-225 °C. ESI-MS  $m/z$ : 687.46  $[\text{M}+\text{H}]^+$ .  $^1\text{H}$   
248 NMR (500 MHz,  $\text{CDCl}_3$ )  $\delta$  8.90 (d,  $J = 8.3$  Hz, 2H), 8.23 (d,  $J = 7.8$  Hz, 1H), 7.60 (t,  
249  $J = 7.7$  Hz, 1H), 7.50 (d,  $J = 8.3$  Hz, 1H), 7.37 (s, 1H), 7.26 (s, 1H), 7.06 (q,  $J = 8.2$   
250 Hz, 4H), 5.57 (s, 2H), 4.57 (s, 2H), 2.28 (s, 3H), 2.10 (s, 2H).  $^{13}\text{C}$  NMR (126 MHz,  
251  $\text{CDCl}_3$ )  $\delta$  166.14, 141.80, 137.99, 137.89, 137.83, 132.77, 132.15, 129.70, 129.01,  
252 128.66, 126.59, 122.21, 121.58, 120.89, 117.77, 110.22, 65.12, 47.10, 25.67, 21.05.

253 **6o** pentane-1,5-diyl-bis-(9-(4-methylbenzyl)-9H-pyrido[3,4-*b*]indole-3-carboxylate)

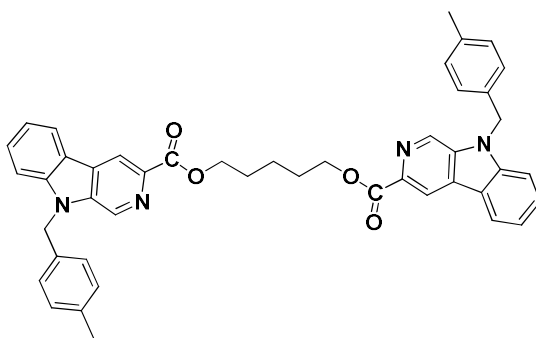

254

255 White flake, yield: 50%, m.p.: 109-111 °C. ESI-MS  $m/z$ : 701.67  $[M+H]^+$ .  $^1H$   
256 NMR (500 MHz,  $CDCl_3$ )  $\delta$  8.92 (d,  $J = 10.5$  Hz, 2H), 8.24 (d,  $J = 7.8$  Hz, 1H), 7.64 (t,  
257  $J = 7.7$  Hz, 1H), 7.53 (d,  $J = 8.3$  Hz, 1H), 7.38 (t,  $J = 7.5$  Hz, 1H), 7.31 (s, 1H), 7.09  
258 (q,  $J = 8.1$  Hz, 4H), 5.57 (s, 2H), 4.55 (t,  $J = 6.8$  Hz, 2H), 2.32 (s, 3H), 2.18–1.95 (m,  
259 2H).  $^{13}C$  NMR (126 MHz,  $CDCl_3$ )  $\delta$  166.17, 141.77, 137.95, 137.90, 132.76, 132.13,  
260 129.69, 128.98, 128.65, 126.58, 122.18, 121.55, 120.87, 117.70, 110.18, 109.32,  
261 65.36, 47.07, 28.60, 22.62, 21.05.

262 **6p** hexane-1,6-diyl-bis-(9-(4-methylbenzyl)-9H-pyrido[3,4-*b*]indole-3-carboxylate)

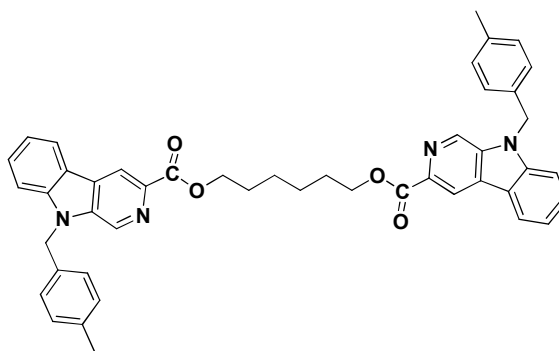

263  
264 White flake, yield: 69%, m.p.: 115-117 °C. ESI-MS  $m/z$ : 715.59  $[M+H]^+$ .  $^1H$   
265 NMR (500 MHz,  $CDCl_3$ )  $\delta$  8.90 (d,  $J = 15.9$  Hz, 2H), 8.23 (d,  $J = 7.8$  Hz, 1H), 7.63 –  
266 7.57 (m, 1H), 7.50 (d,  $J = 8.3$  Hz, 1H), 7.38 (s, 1H), 7.26 (s, 1H), 7.06 (q,  $J = 8.3$  Hz,  
267 4H), 5.56 (s, 2H), 4.48 (t,  $J = 6.8$  Hz, 2H), 2.28 (s, 3H), 1.98–1.88 (m, 2H), 1.62–1.58  
268 (m, 2H).  $^{13}C$  NMR (126 MHz,  $CDCl_3$ )  $\delta$  166.21, 141.80, 137.97, 137.89, 132.78,  
269 132.13, 129.69, 129.00, 128.67, 126.60, 122.19, 121.59, 120.87, 117.69, 110.20,  
270 65.58, 47.10, 29.71, 28.83, 25.85, 21.05.

271 **6q** octane-1,8-diyl-bis-(9-(4-methylbenzyl)-9H-pyrido[3,4-*b*]indole-3-carboxylate)



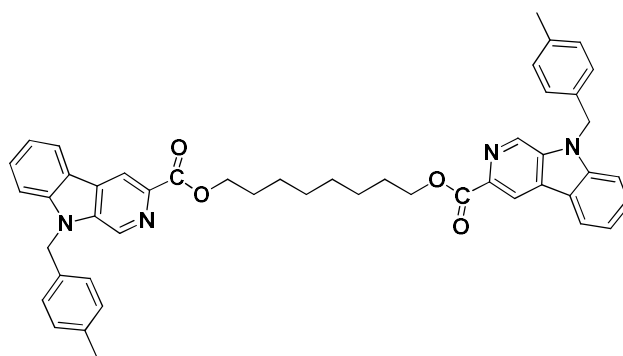

272

273 White flake, yield: 47.6%, m.p.: 178-180 °C. ESI-MS  $m/z$ : 743.55  $[M+H]^+$ . <sup>1</sup>H

274 NMR (500 MHz, CDCl<sub>3</sub>)  $\delta$  8.90 (d,  $J$  = 17.5 Hz, 2H), 8.23 (d,  $J$  = 7.9 Hz, 1H), 7.60 (t,

275  $J$  = 7.7 Hz, 1H), 7.50 (d,  $J$  = 8.3 Hz, 1H), 7.36 (t,  $J$  = 7.5 Hz, 1H), 7.26 (s, 1H), 7.06

276 (q,  $J$  = 8.1 Hz, 4H), 5.57 (s, 2H), 4.46 (t,  $J$  = 6.9 Hz, 2H), 2.28 (s, 3H), 1.93–1.83 (m,

277 2H), 1.46 (d,  $J$  = 33.2 Hz, 4H). <sup>13</sup>C NMR (126 MHz, CDCl<sub>3</sub>)  $\delta$  166.23, 141.81, 138.04,

278 137.97, 137.90, 132.80, 132.14, 129.69, 129.00, 128.68, 126.60, 122.16, 121.59,

279 120.87, 117.67, 110.21, 65.72, 47.10, 29.25, 28.86, 25.96, 21.05.

280 **6r** 1,4-phenylene-bis-(methylene)-bis-(9-(4-methylbenzyl)-9H-pyrido[3,4-*b*]indole-3-

281 carboxylate)

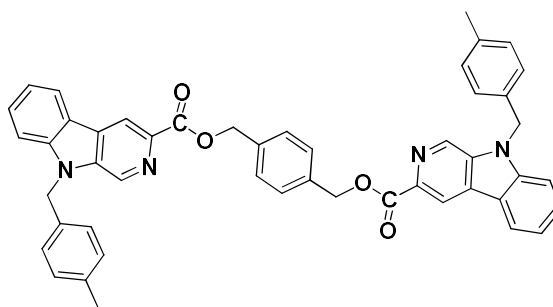

282

283 White flake, yield: 34.4%, m.p.: 266-268 °C. ESI-MS  $m/z$ : 735.32  $[M+H]^+$ . <sup>1</sup>H

284 NMR (500 MHz, CDCl<sub>3</sub>)  $\delta$  8.99 (s, 1H), 8.91 (s, 1H), 8.24 (d,  $J$  = 7.8 Hz, 1H), 7.63 (t,

285  $J$  = 7.6 Hz, 1H), 7.58 (s, 2H), 7.52 (d,  $J$  = 8.3 Hz, 1H), 7.38 (t,  $J$  = 7.5 Hz, 1H), 7.26

286 (s, 2H), 7.06 (dd,  $J$  = 16.8, 7.8 Hz, 4H), 5.60 (s, 2H), 5.53 (s, 2H), 2.28 (s, 3H). <sup>13</sup>C

287 NMR (126 MHz, CDCl<sub>3</sub>)  $\delta$  165.19, 142.11, 138.01, 137.86, 136.61, 136.14, 132.50,

288 131.64, 129.74, 129.48, 129.15, 128.96, 126.57, 122.35, 121.42, 121.21, 118.05,  
289 110.39, 67.08, 47.26, 21.06.

290 **6s** propane-1,3-diyl-bis-(9-(2-fluorobenzyl)-9H-pyrido[3,4-*b*]indole-3-carboxylate)

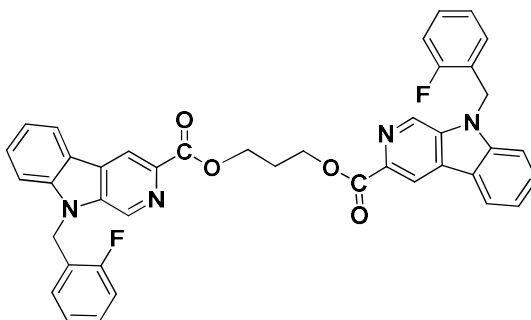

291

292 White flake, yield: 65.4%, m.p.: 208-210 °C. ESI-MS *m/z*: 681.49 [M+H]<sup>+</sup>. <sup>1</sup>H  
293 NMR (500 MHz, CDCl<sub>3</sub>) δ 8.86 (s, 1H), 8.77 (s, 1H), 8.14 (d, *J* = 7.9 Hz, 1H), 7.62 (t,  
294 *J* = 7.7 Hz, 1H), 7.48 (d, *J* = 8.3 Hz, 1H), 7.36 (t, *J* = 7.5 Hz, 1H), 7.28–7.20 (m, 2H),  
295 7.10 (t, *J* = 9.3 Hz, 1H), 6.93 (t, *J* = 7.5 Hz, 1H), 6.79 (t, *J* = 7.6 Hz, 1H), 5.45 (s, 2H),  
296 4.72 (t, *J* = 5.8 Hz, 2H), 2.50–2.43 (m, 1H), 1.68 (s, 3H). <sup>13</sup>C NMR (126 MHz, CDCl<sub>3</sub>)  
297 δ 165.93, 159.41, 141.50, 137.92, 137.75, 131.94, 129.97, 129.91, 129.09, 128.56,  
298 128.42, 128.39, 124.67, 124.64, 122.86, 122.75, 122.21, 121.49, 121.03, 117.73,  
299 115.87, 115.70, 109.99, 62.95, 40.82, 29.72, 28.51.

300 **6t** butane-1,4-diyl-bis-(9-(2-fluorobenzyl)-9H-pyrido[3,4-*b*]indole-3-carboxylate)

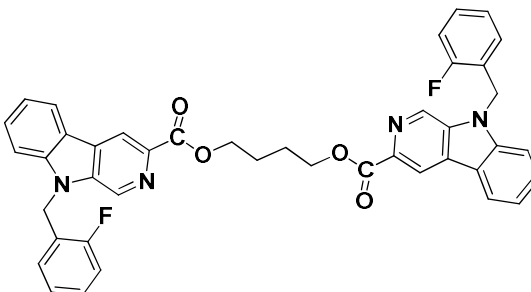

301

302 Needle crystal, yield: 50%, m.p.: 213-215 °C. ESI-MS *m/z*: 695.69 [M+H]<sup>+</sup>. <sup>1</sup>H  
303 NMR (500 MHz, CDCl<sub>3</sub>) δ 8.97 (s, 1H), 8.90 (s, 1H), 8.23 (d, *J* = 7.8 Hz, 1H), 7.63 (t,

304  $J = 7.7$  Hz, 1H), 7.54 (d,  $J = 8.3$  Hz, 1H), 7.38 (t,  $J = 7.5$  Hz, 1H), 7.29–7.21 (m, 2H),  
305 7.15–7.07 (m, 1H), 6.95 (t,  $J = 7.5$  Hz, 1H), 6.86 (t,  $J = 7.1$  Hz, 1H), 5.66 (s, 2H),  
306 4.58 (s, 2H), 2.11 (s, 2H).  $^{13}\text{C}$  NMR (126 MHz,  $\text{CDCl}_3$ )  $\delta$  166.08, 161.41, 159.45,  
307 141.65, 138.10, 137.91, 132.00, 129.97, 129.91, 129.13, 128.80, 128.47, 128.44,  
308 124.67, 124.64, 122.80, 122.24, 121.61, 121.09, 117.75, 115.88, 115.72, 110.09,  
309 65.15, 40.99, 29.71, 25.67.

310 **6u** pentane-1,5-diyl-bis-(9-(2-fluorobenzyl)-9H-pyrido[3,4-*b*]indole-3-carboxylate)

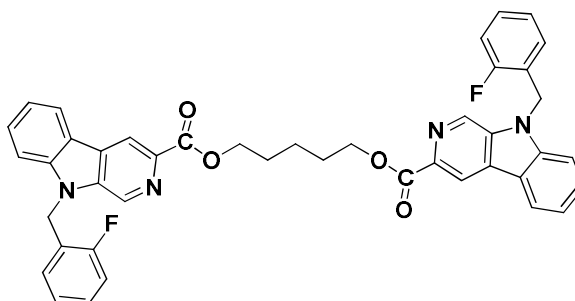

311

312 White flake, yield: 67.8%, m.p.: 187-188 °C. ESI-MS  $m/z$ : 709.39  $[\text{M}+\text{H}]^+$ .  $^1\text{H}$   
313 NMR (500 MHz,  $\text{CDCl}_3$ )  $\delta$  8.94 (s, 1H), 8.87 (s, 1H), 8.19 (d,  $J = 7.8$  Hz, 1H), 7.61 (t,  
314  $J = 7.7$  Hz, 1H), 7.52 (d,  $J = 8.3$  Hz, 1H), 7.35 (t,  $J = 7.5$  Hz, 1H), 7.28–7.20 (m, 2H),  
315 7.15–7.06 (m, 1H), 6.94 (t,  $J = 7.5$  Hz, 1H), 6.84 (t,  $J = 7.1$  Hz, 1H), 5.61 (s, 2H),  
316 4.52 (t,  $J = 6.8$  Hz, 2H), 2.07–1.94 (m, 2H), 1.71 (dd,  $J = 9.3, 6.2$  Hz, 1H).  $^{13}\text{C}$  NMR  
317 (126 MHz,  $\text{CDCl}_3$ )  $\delta$  166.11, 161.40, 159.44, 141.61, 138.19, 137.86, 131.99, 129.97,  
318 129.91, 129.09, 128.76, 128.47, 128.44, 124.66, 124.63, 122.90, 122.79, 122.19,  
319 121.57, 121.05, 117.67, 115.88, 115.71, 110.04, 65.38, 40.98, 40.94, 29.71, 28.59,  
320 22.61.

321 **6v** hexane-1,6-diyl-bis-(9-(2-fluorobenzyl)-9H-pyrido[3,4-*b*]indole-3-carboxylate)

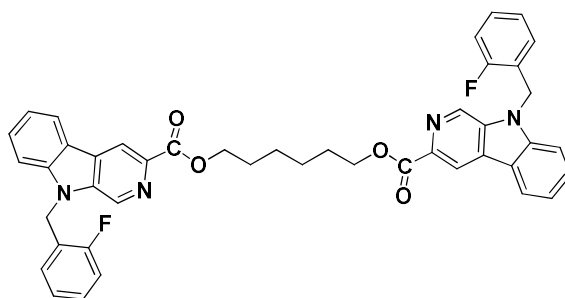

322

323 White solid, yield: 54.6%, m.p.: 199-201 °C. ESI-MS  $m/z$ : 723.48  $[M+H]^+$ .  $^1H$   
 324 NMR (500 MHz,  $CDCl_3$ )  $\delta$  8.96 (s, 1H), 8.88 (s, 1H), 8.23 (d,  $J = 7.8$  Hz, 1H), 7.63 (t,  
 325  $J = 7.7$  Hz, 1H), 7.53 (d,  $J = 8.3$  Hz, 1H), 7.38 (t,  $J = 7.5$  Hz, 1H), 7.29–7.20 (m, 2H),  
 326 7.16–7.07 (m, 1H), 6.95 (t,  $J = 7.5$  Hz, 1H), 6.86 (t,  $J = 7.5$  Hz, 1H), 5.65 (s, 2H),  
 327 4.49 (t,  $J = 6.8$  Hz, 2H), 2.05–1.89 (m, 2H), 1.61 (d,  $J = 7.0$  Hz, 2H).  $^{13}C$  NMR (126  
 328 MHz,  $CDCl_3$ )  $\delta$  166.16, 161.42, 159.45, 141.65, 138.26, 137.88, 131.98, 129.98,  
 329 129.91, 129.12, 128.80, 128.49, 128.46, 124.66, 124.64, 122.92, 122.22, 121.61,  
 330 121.07, 117.67, 115.88, 115.72, 110.07, 65.61, 41.02, 40.98, 29.71, 28.83, 25.85.  
 331 **6v** octane-1,8-diyl-bis-(9-(2-fluorobenzyl)-9H-pyrido[3,4-*b*]indole-3-carboxylate)

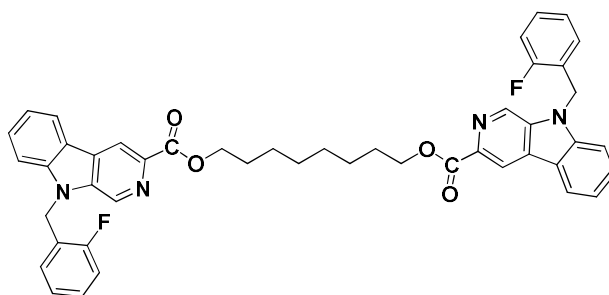

332

333 White solid, yield: 65%, m.p.: 148-150 °C. ESI-MS  $m/z$ : 751.48  $[M+H]^+$ .  $^1H$   
 334 NMR (500 MHz,  $CDCl_3$ )  $\delta$  8.97 (s, 1H), 8.89 (s, 1H), 8.23 (d,  $J = 7.9$  Hz, 1H), 7.62 (t,  
 335  $J = 7.7$  Hz, 1H), 7.54 (d,  $J = 8.3$  Hz, 1H), 7.38 (t,  $J = 7.5$  Hz, 1H), 7.25 (dd,  $J = 12.7$ ,  
 336 4.3 Hz, 2H), 7.11 (t,  $J = 9.2$  Hz, 1H), 6.95 (t,  $J = 7.5$  Hz, 1H), 6.86 (t,  $J = 7.5$  Hz, 1H),  
 337 5.66 (s, 2H), 4.46 (t,  $J = 6.7$  Hz, 2H), 1.93–1.83 (m, 2H), 1.50 (s, 2H), 1.43 (s, 2H).

338  $^{13}\text{C}$  NMR (126 MHz,  $\text{CDCl}_3$ )  $\delta$  166.18, 159.46, 141.66, 138.31, 137.89, 131.99,  
339 129.98, 129.92, 129.12, 128.82, 128.47, 124.66, 124.63, 122.93, 122.82, 122.19,  
340 121.62, 121.07, 117.66, 115.89, 115.72, 110.09, 65.75, 41.03, 40.99, 29.71, 29.24,  
341 28.86, 25.95.

342 **6x** 1,4-phenylenebis(methylene)-bis-(9-(2-fluorobenzyl)-9H-pyrido[3,4-*b*]indole-3-  
343 carboxylate)

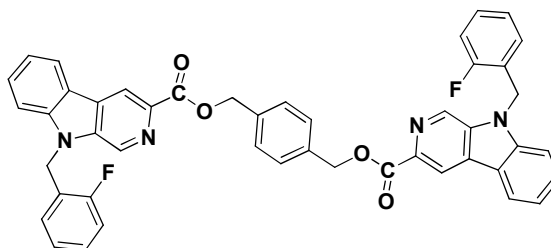

344

345 White flake solid, yield: 61.2%, m.p.: 277-279 °C. ESI-MS  $m/z$ :

346 743.56 $[\text{M}+\text{H}]^+$ .  $^1\text{H}$  NMR (500 MHz,  $\text{CDCl}_3$ )  $\delta$  8.96 (s, 1H), 8.91 (s, 1H), 8.24 (d,  $J$ =  
347 7.8 Hz, 1H), 7.69–7.62 (m, 1H), 7.61–7.54 (m, 3H), 7.39 (t,  $J$ = 7.5 Hz, 1H), 7.33 (s,  
348 1H), 7.26 (dd,  $J$ = 13.9, 6.9 Hz, 1H), 7.17–7.09 (m, 1H), 6.96 (t,  $J$ = 7.5 Hz, 1H), 6.87  
349 (t,  $J$ = 7.5 Hz, 1H), 5.70 (s, 2H), 5.52 (s, 2H).  $^{13}\text{C}$  NMR (126 MHz,  $\text{CDCl}_3$ )  $\delta$  165.71,  
350 141.73, 137.98, 136.13, 131.86, 129.97, 129.91, 129.30, 128.81, 128.38, 124.61,  
351 122.19, 121.42, 121.19, 117.97, 115.83, 115.66, 110.20, 66.91, 49.46, 49.29, 49.12,  
352 48.95, 48.78, 41.08, 29.64.

353

354 S.4. HNMR and CNMR

355 4A

356 H NMR

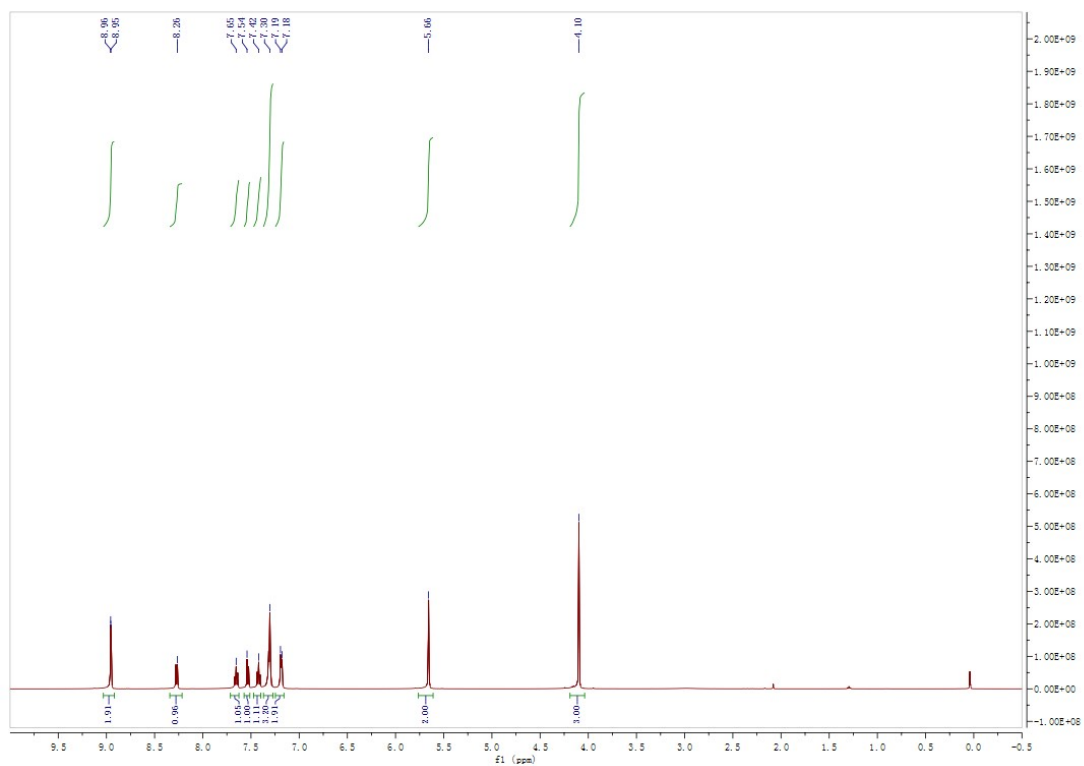

357

358 C NMR

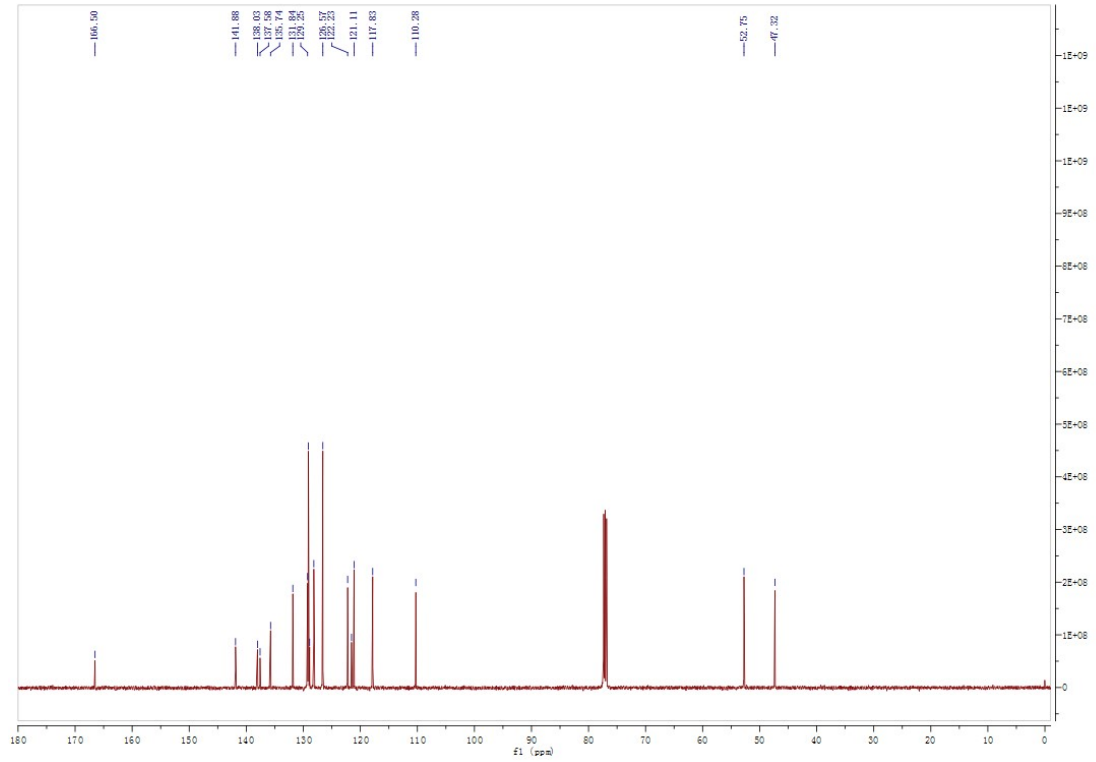

359

360 **4B**

361 <sup>1</sup>H NMR

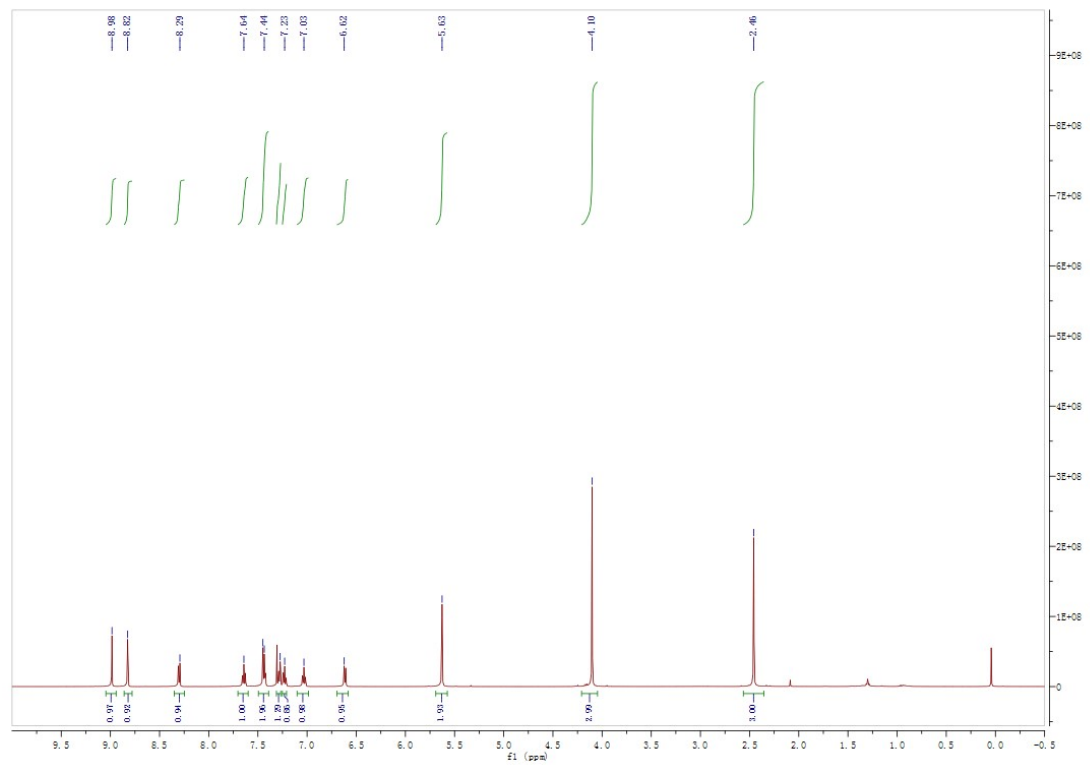

362

363 <sup>13</sup>C NMR

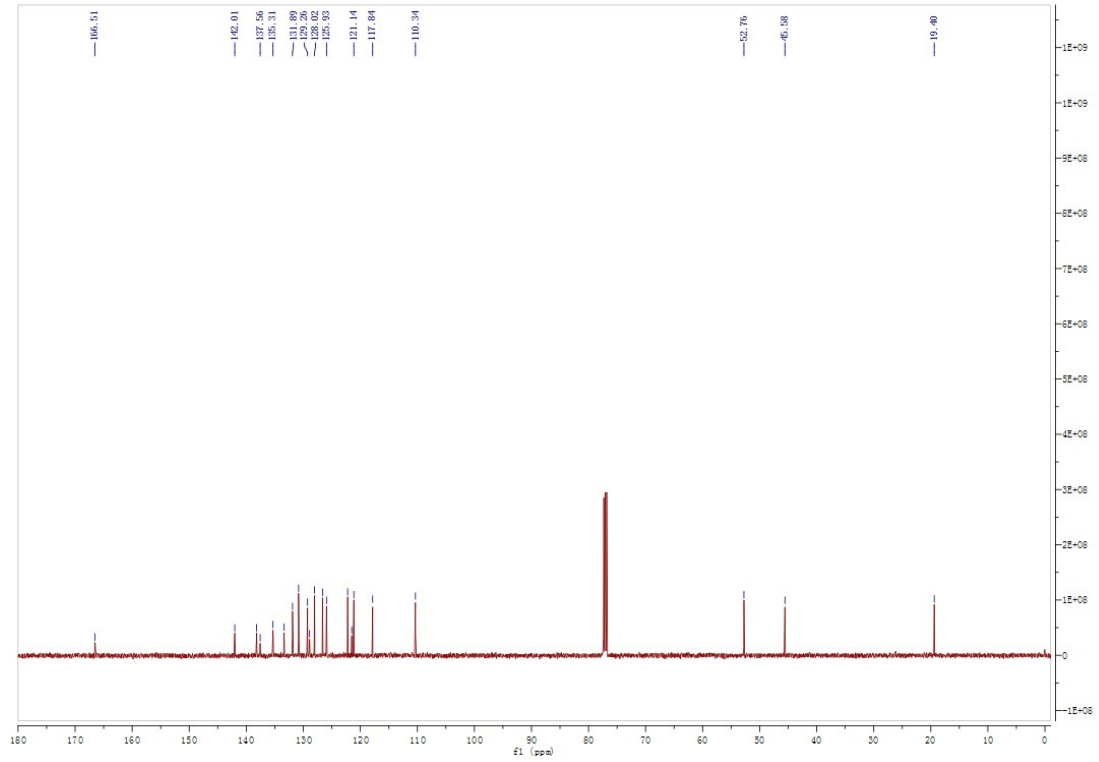

364

365 **4C**

366 **<sup>1</sup>H NMR**

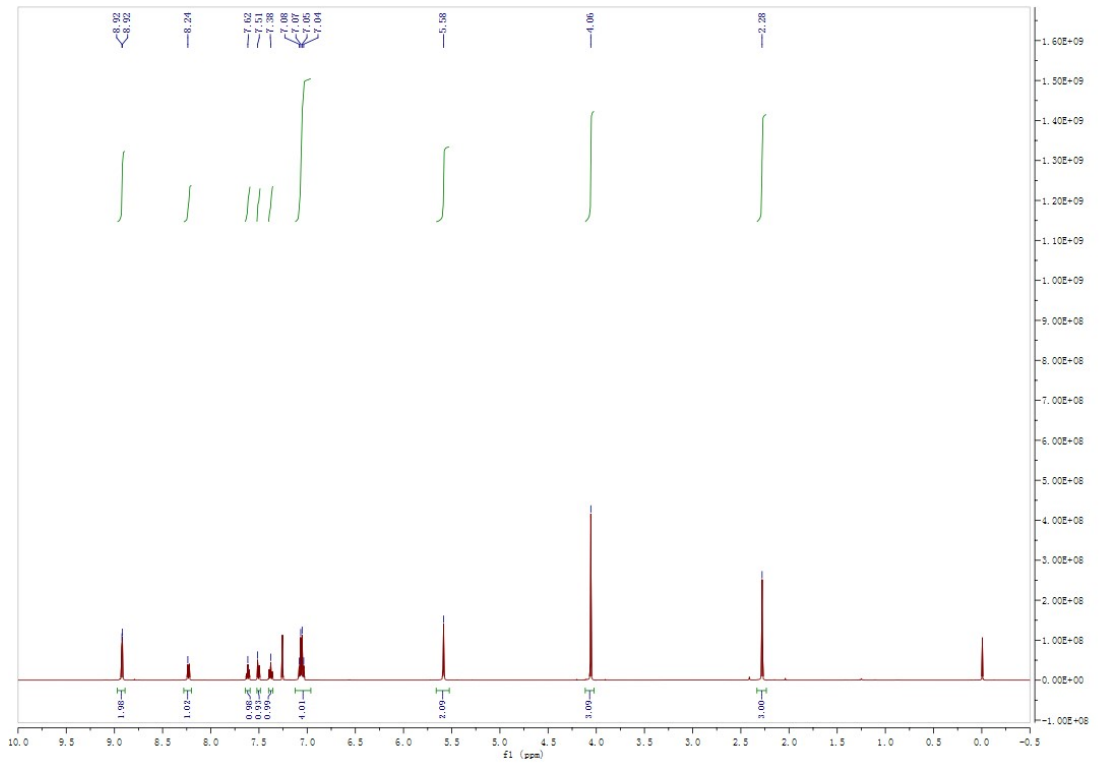

367

368 **<sup>13</sup>C NMR**



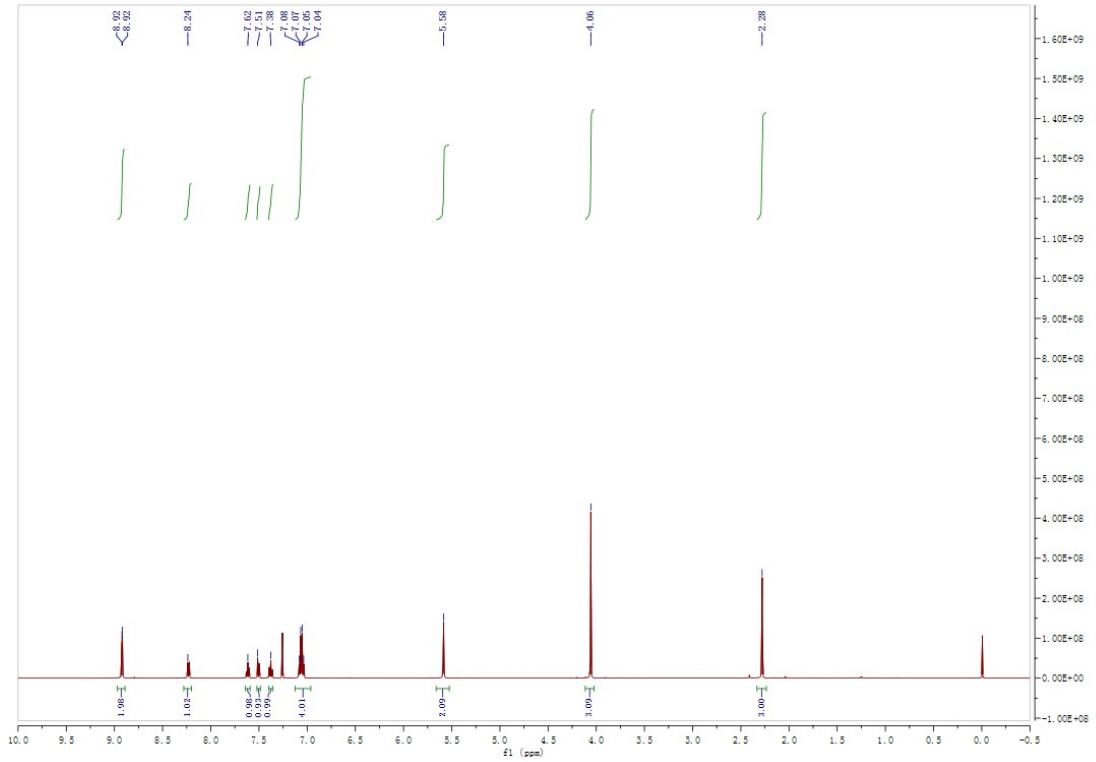

369

370 **4D**

371 **H NMR**

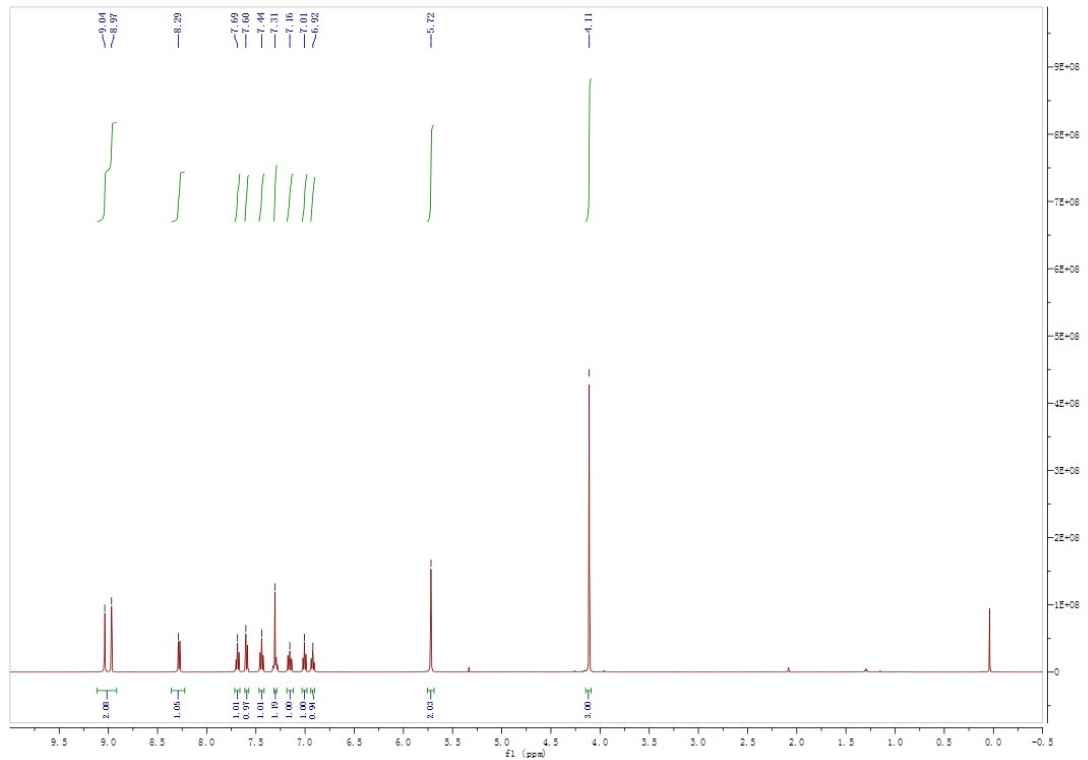

372

373 **C NMR**

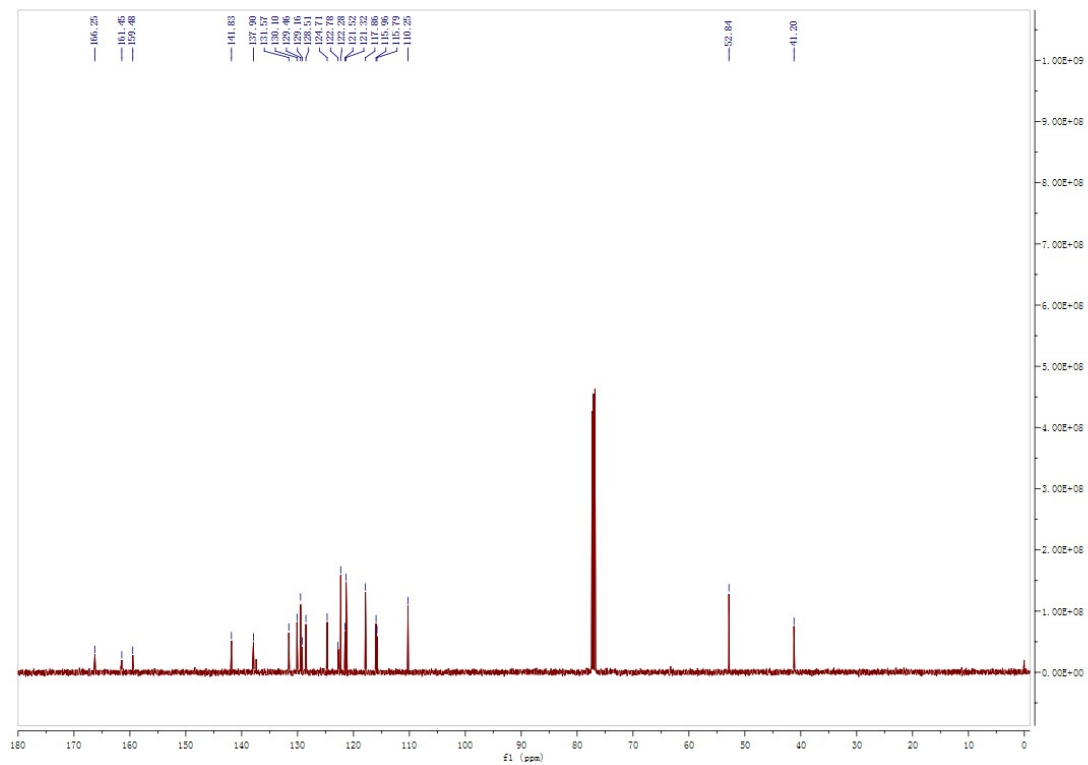

374

375 **6a**

376 <sup>1</sup>H NMR

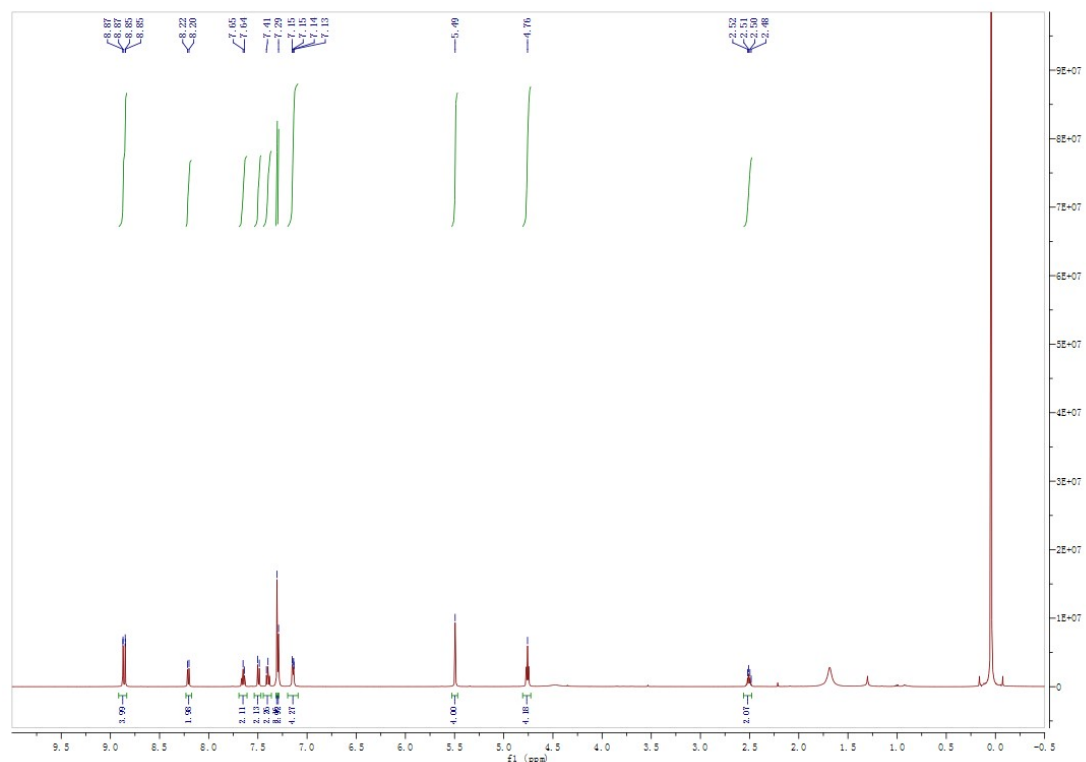

377

378 <sup>13</sup>C NMR

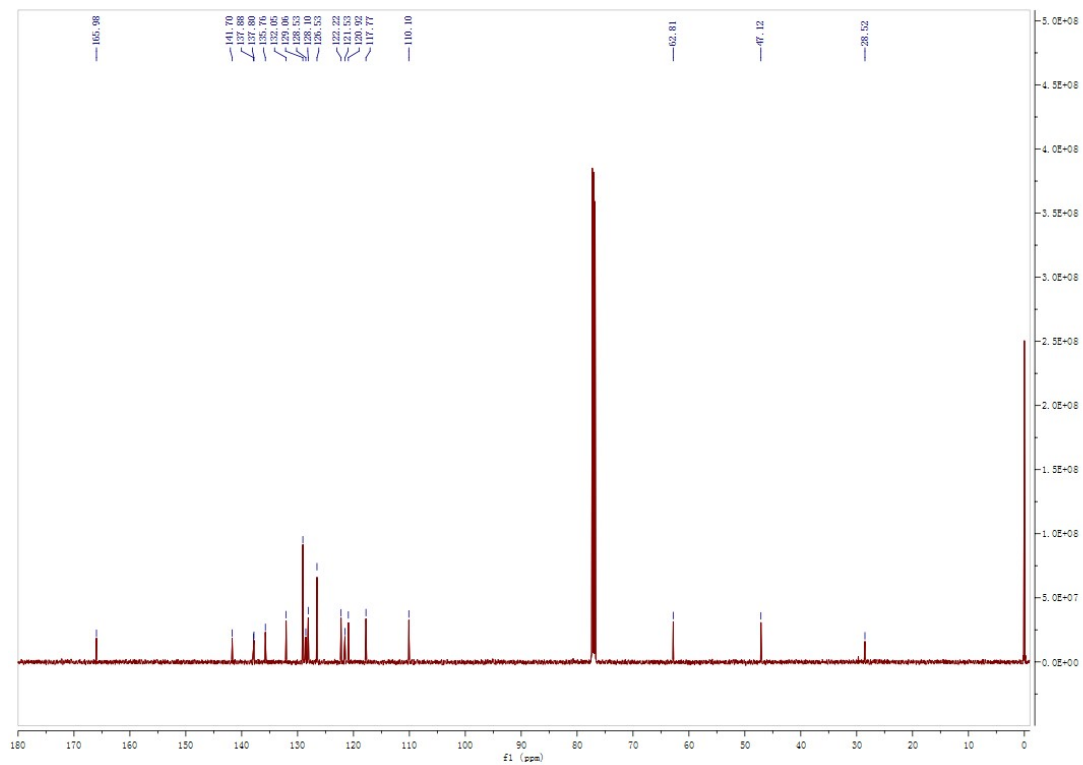

379

380 **6b**

381 <sup>1</sup>H NMR

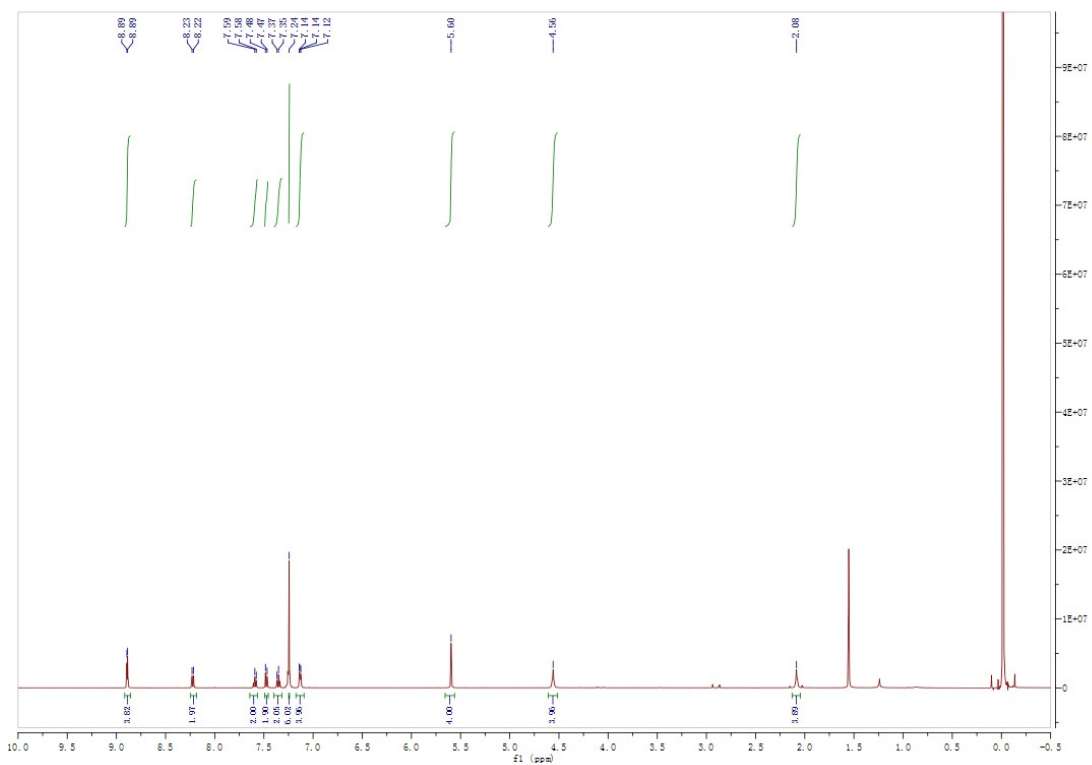

382

383 <sup>13</sup>C NMR

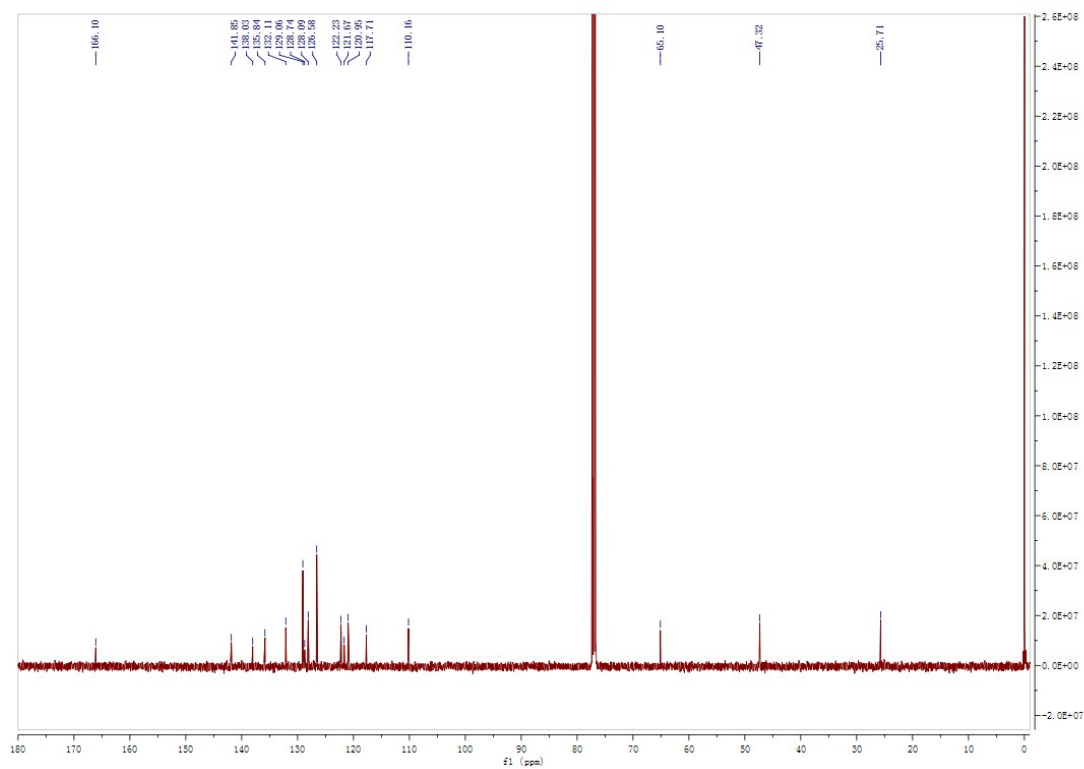

384

385 **6c**

386 **<sup>1</sup>H NMR**

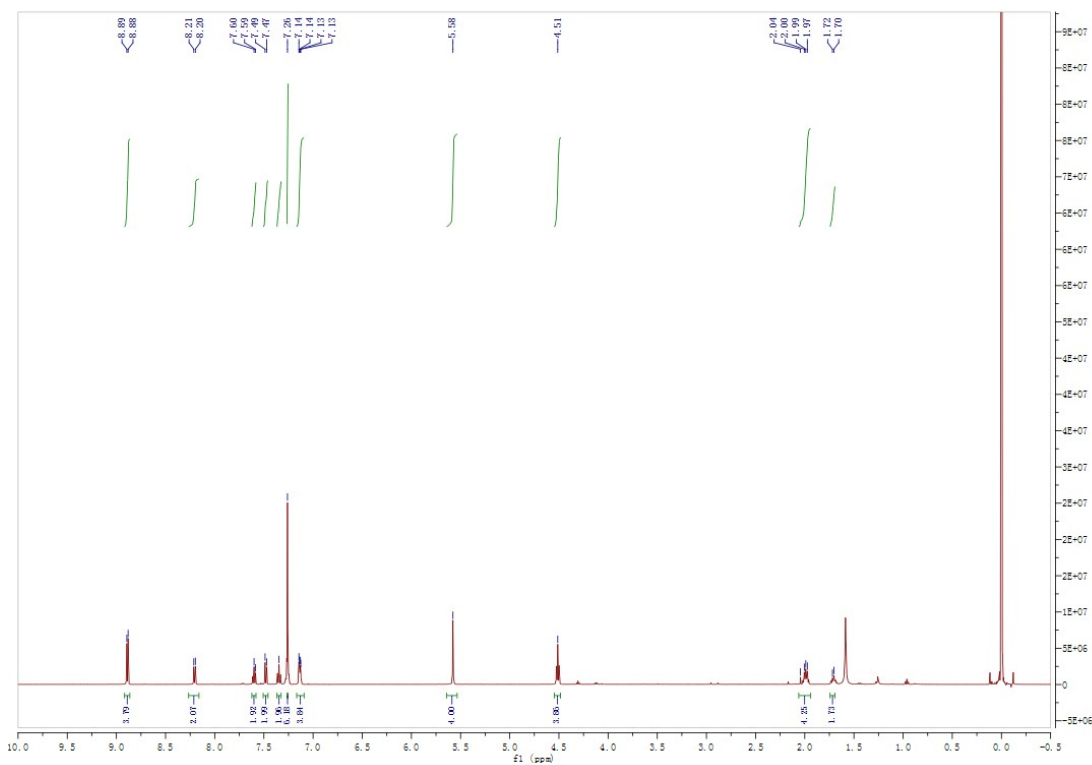

387

388 **<sup>13</sup>C NMR**

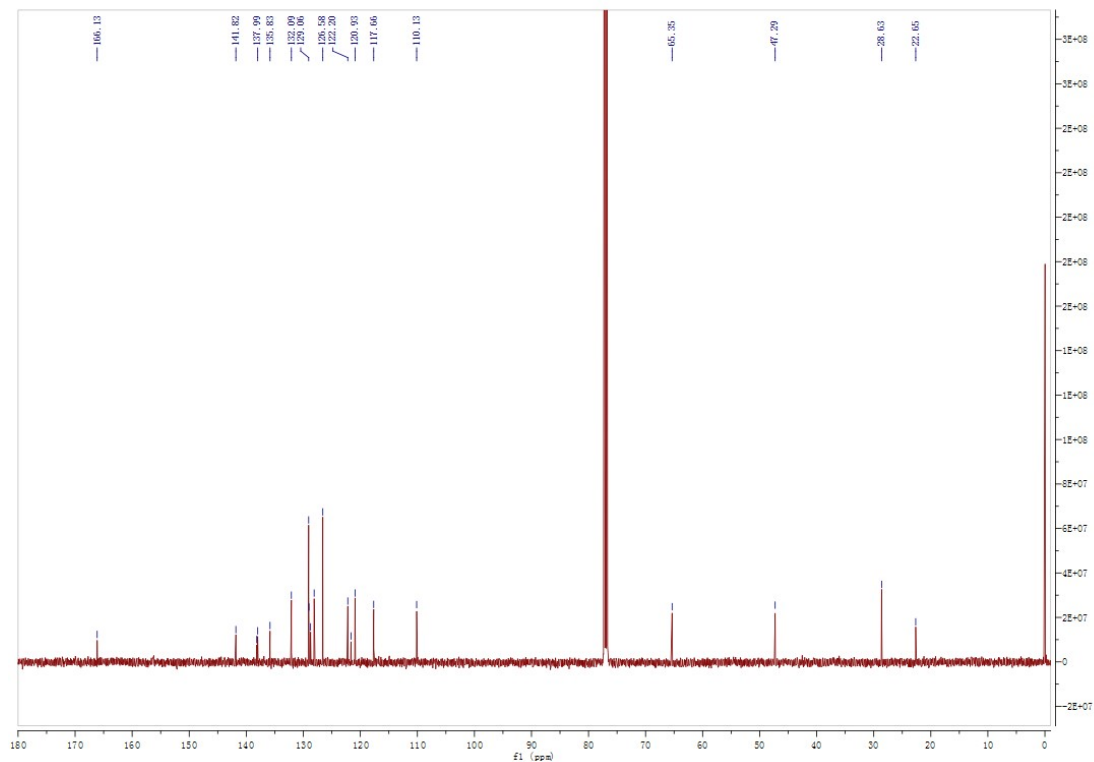

389

390 **6d**

391 **<sup>1</sup>H NMR**

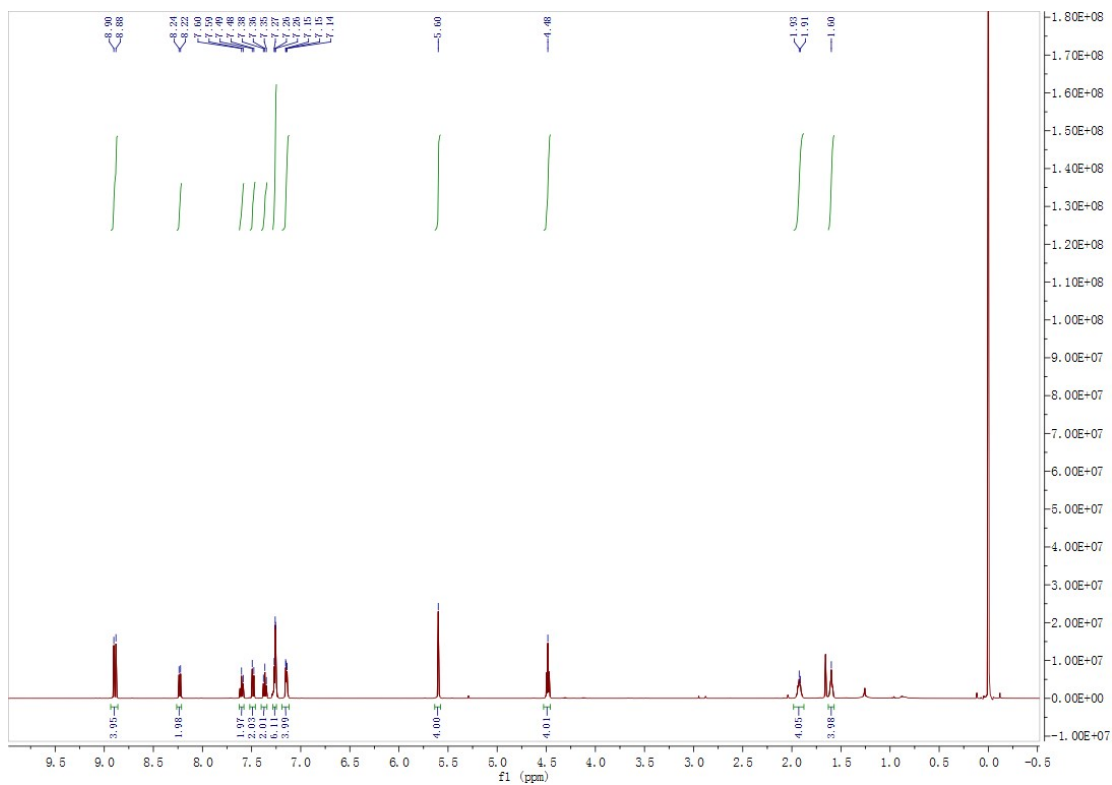

392

393 **<sup>13</sup>C NMR**

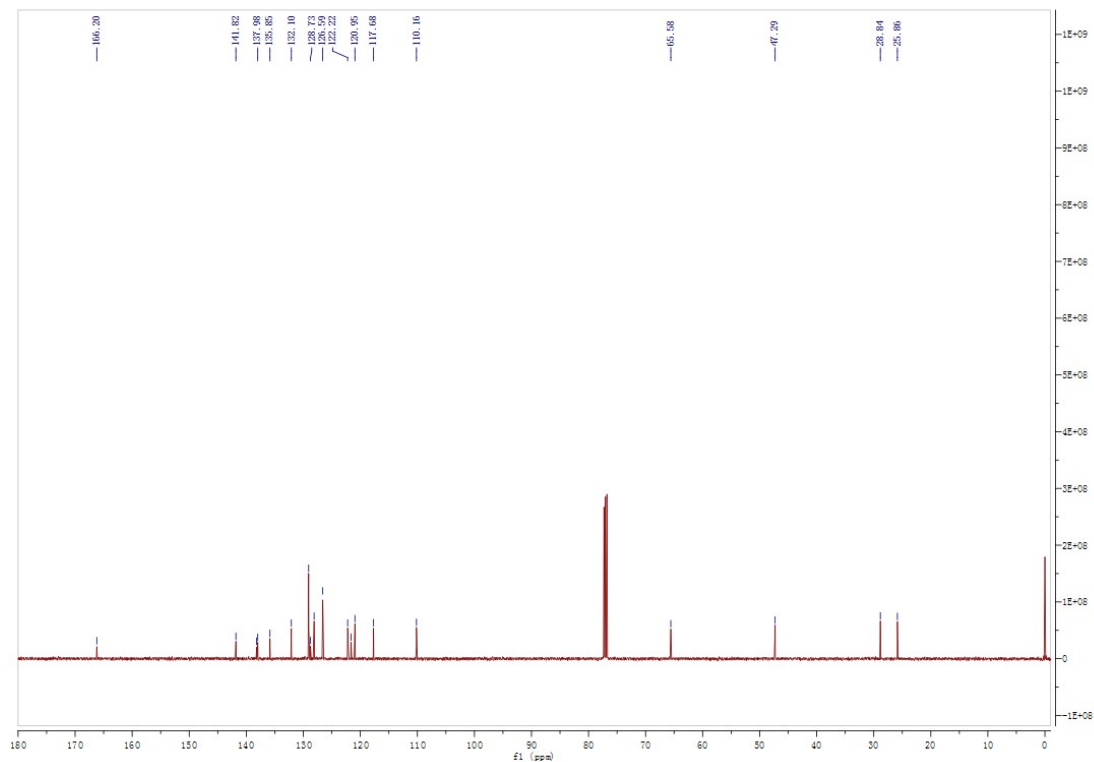

394

395 **6e**

396 <sup>1</sup>H NMR

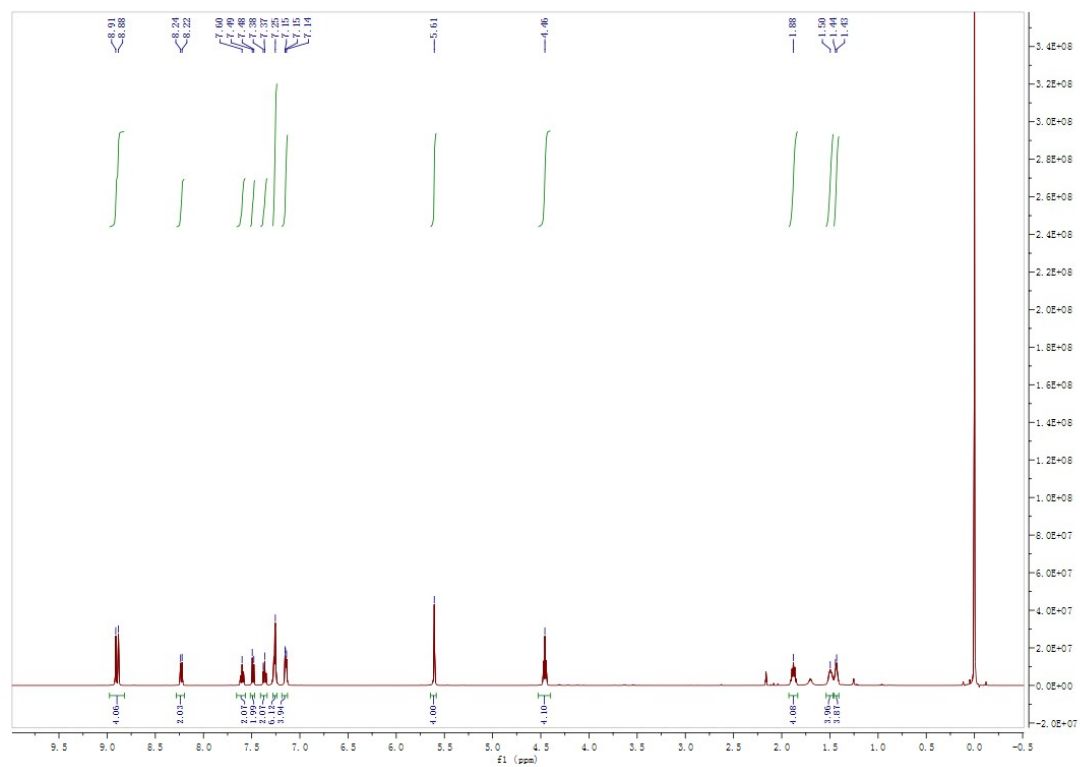

397

398 <sup>13</sup>C NMR

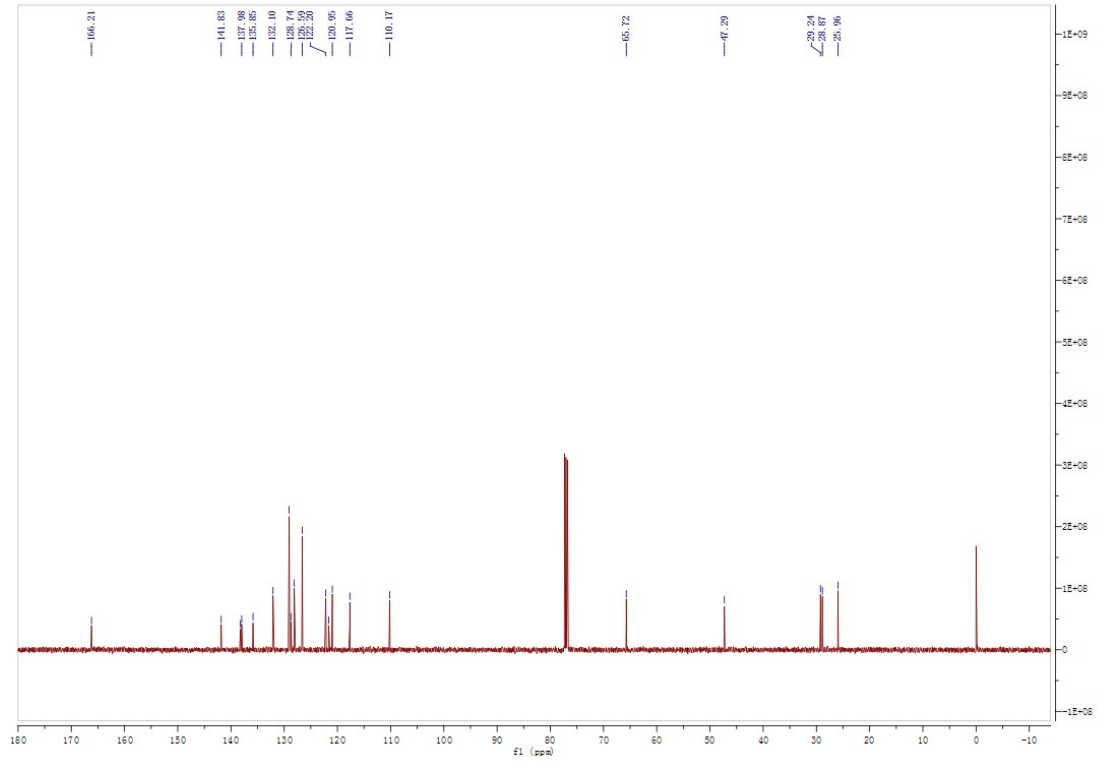

399

400 **6f**

401 **H NMR**

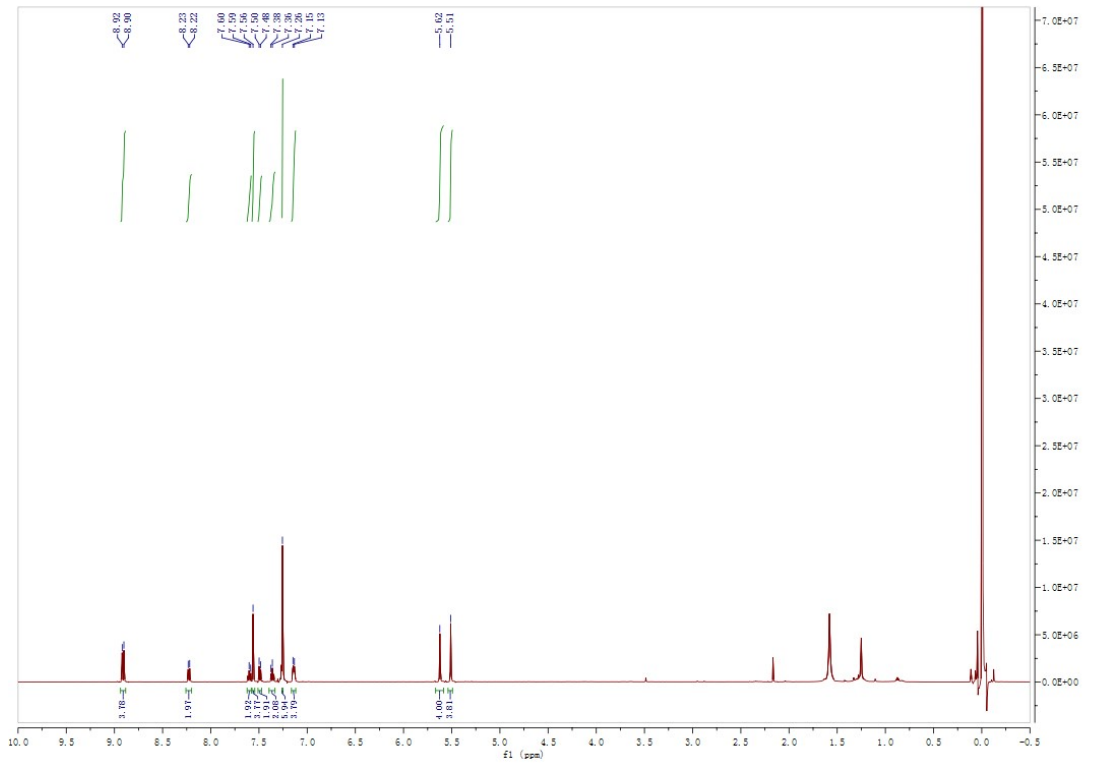

402

403 **C NMR**

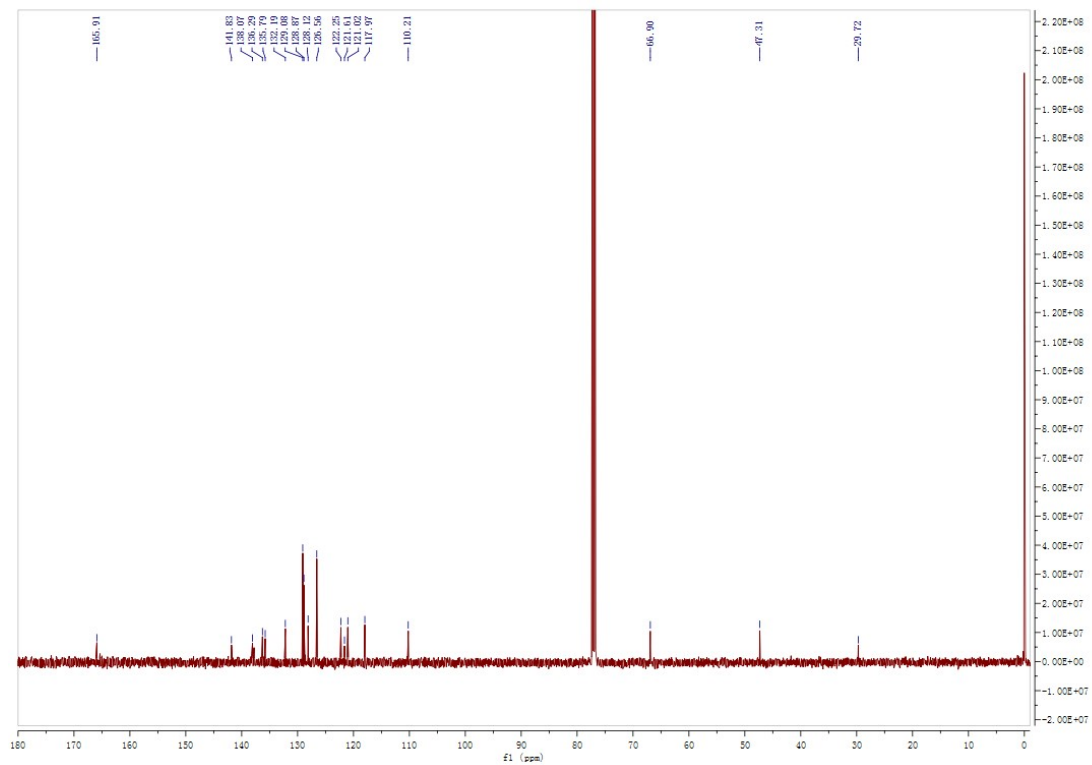

404

405 **6g**

406 **H NMR**

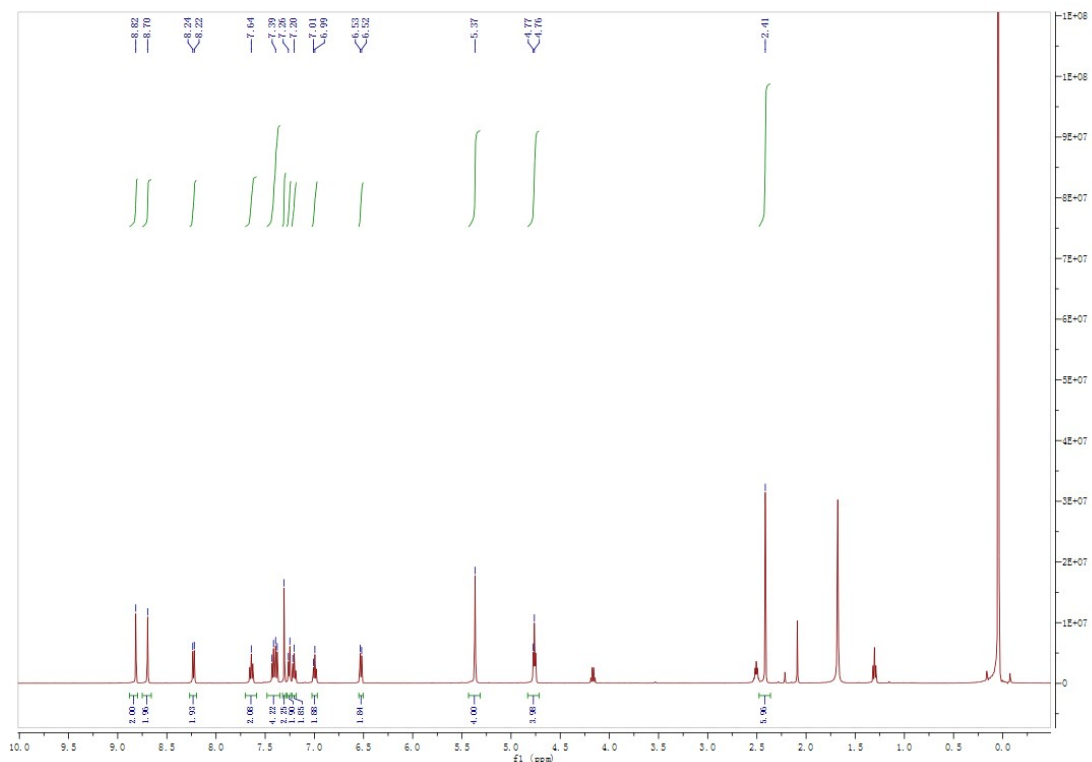

407

408 **C NMR**



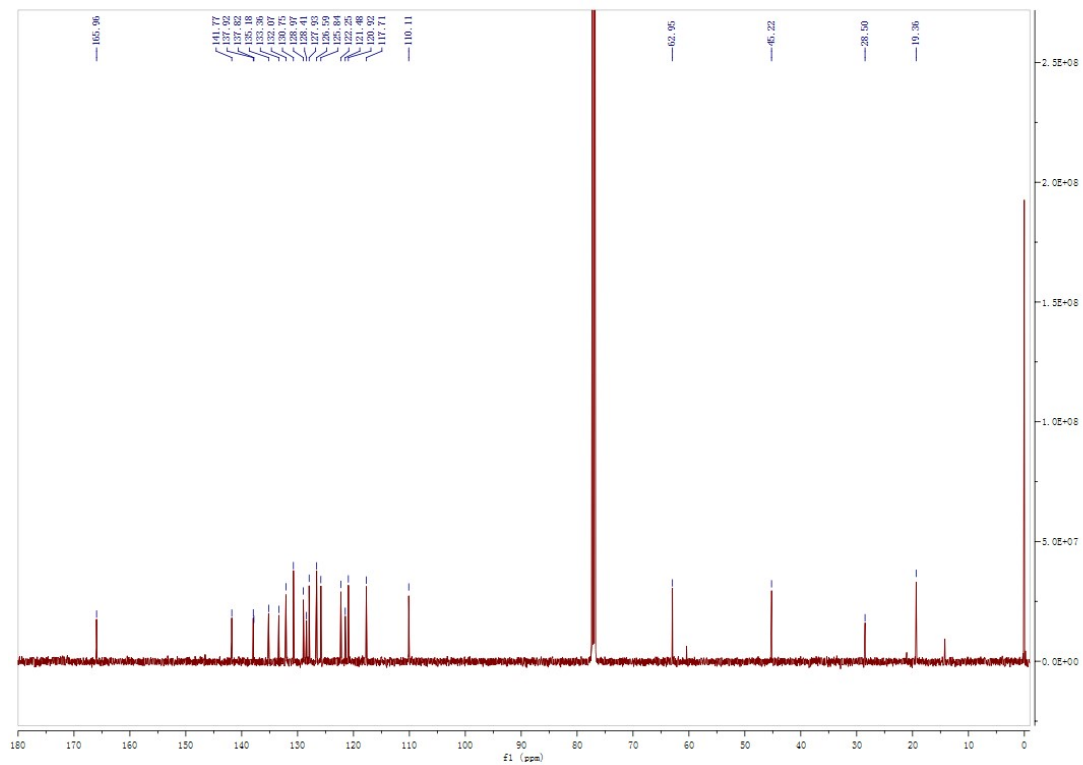

409

410 **6h**

411 **<sup>1</sup>H NMR**

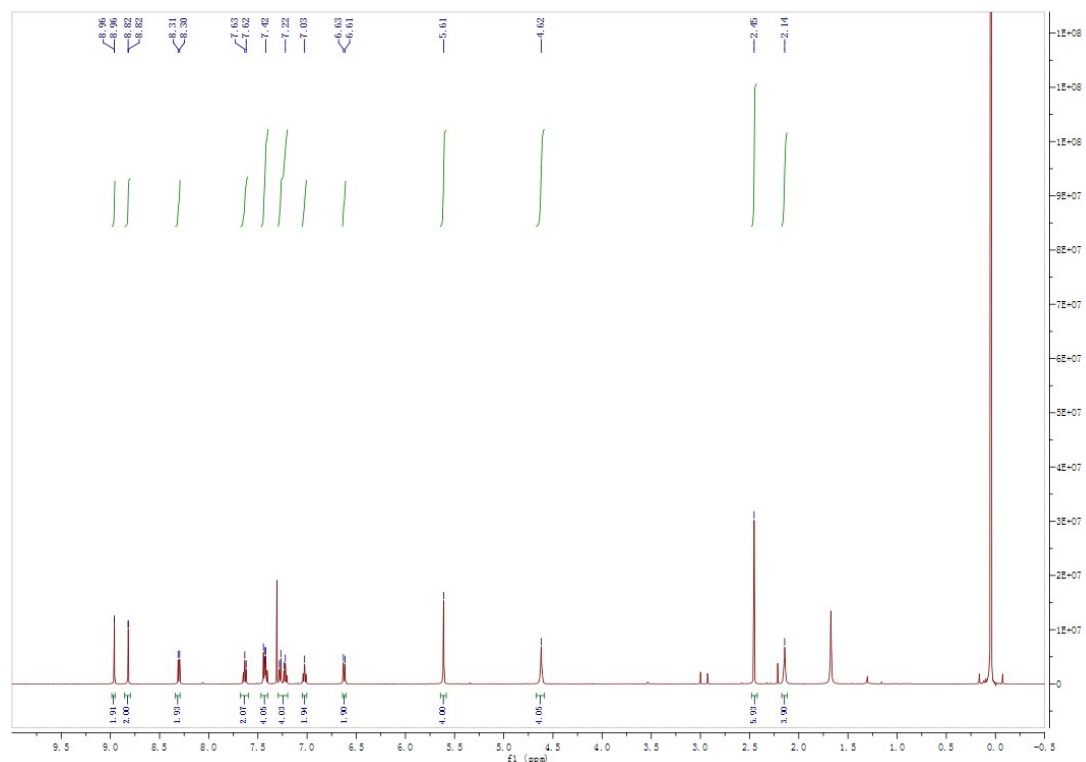

412

413 **<sup>13</sup>C NMR**

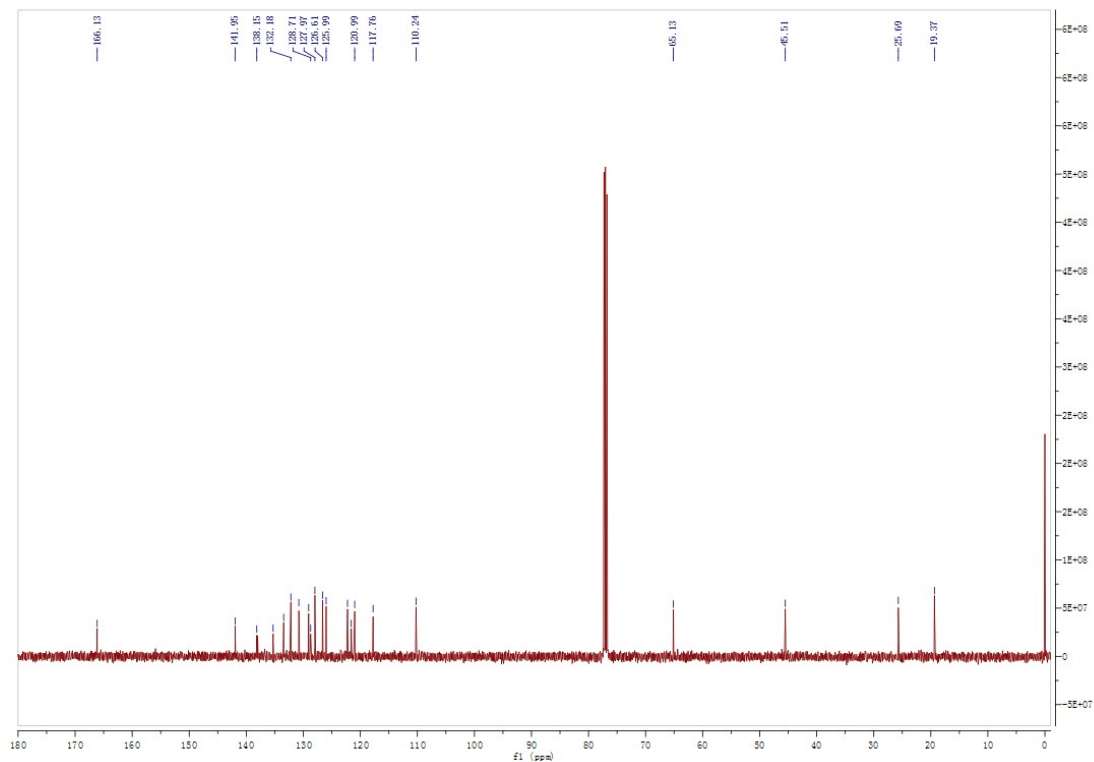

414

415 **6i**

416 **H NMR**

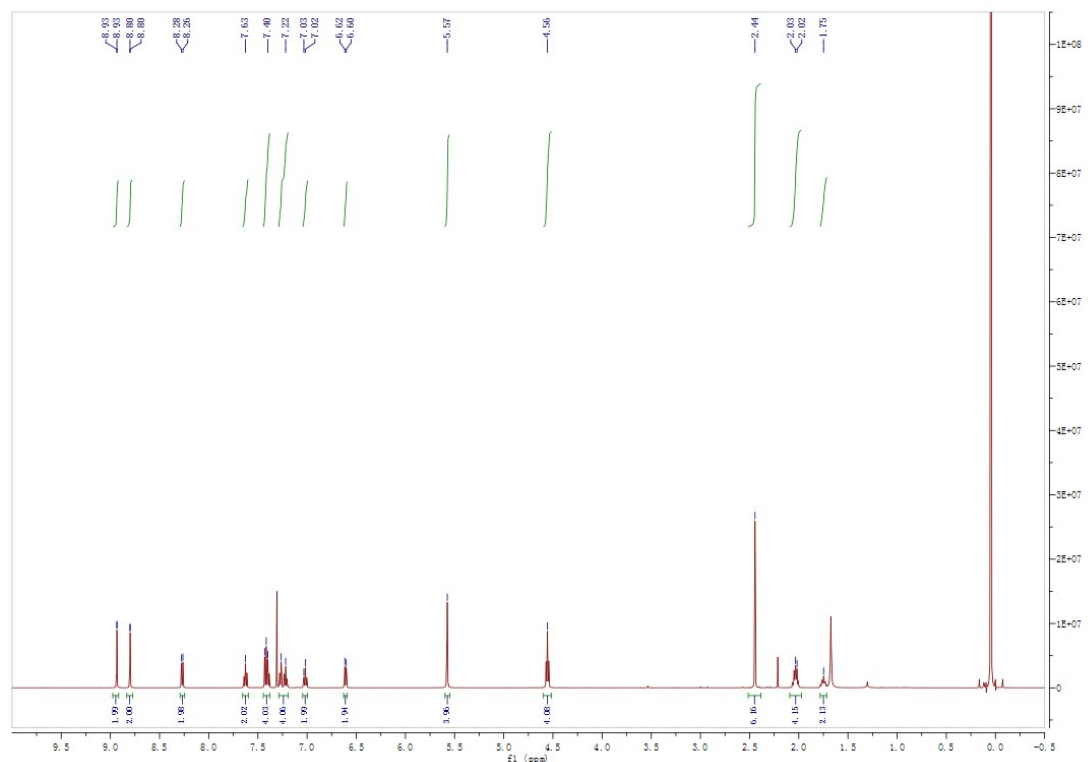

417

418 **C NMR**

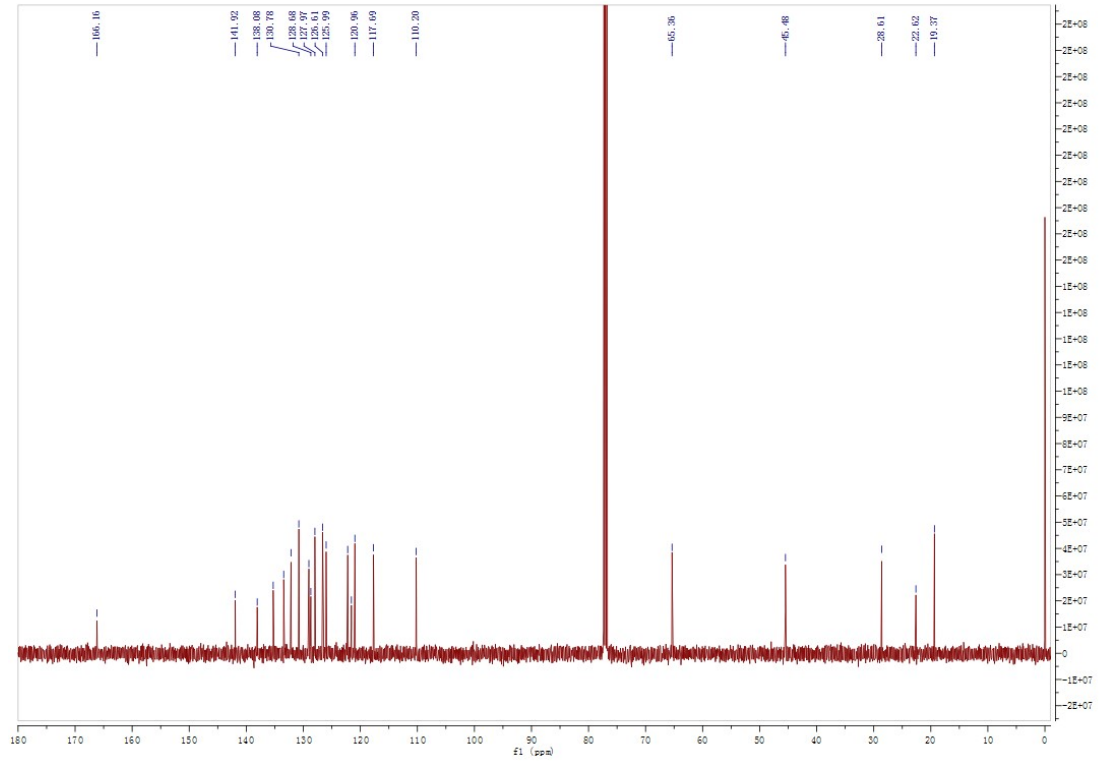

419

420 **6j**

421 **H NMR**

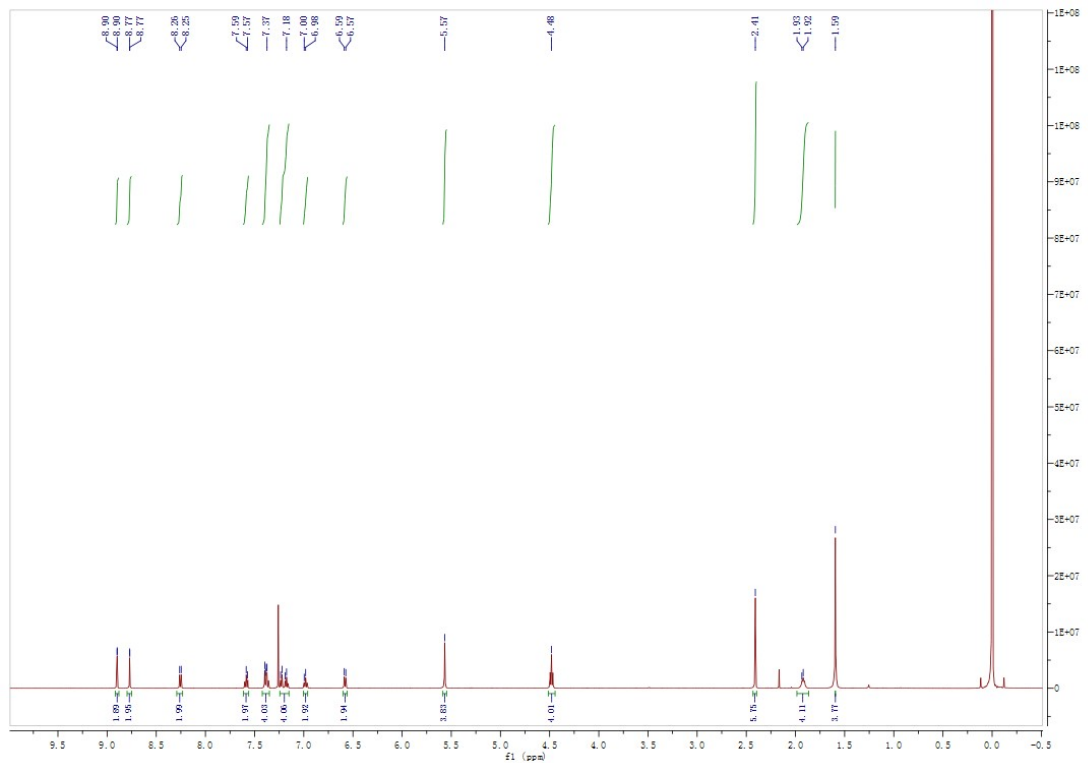

422

423 **C NMR**

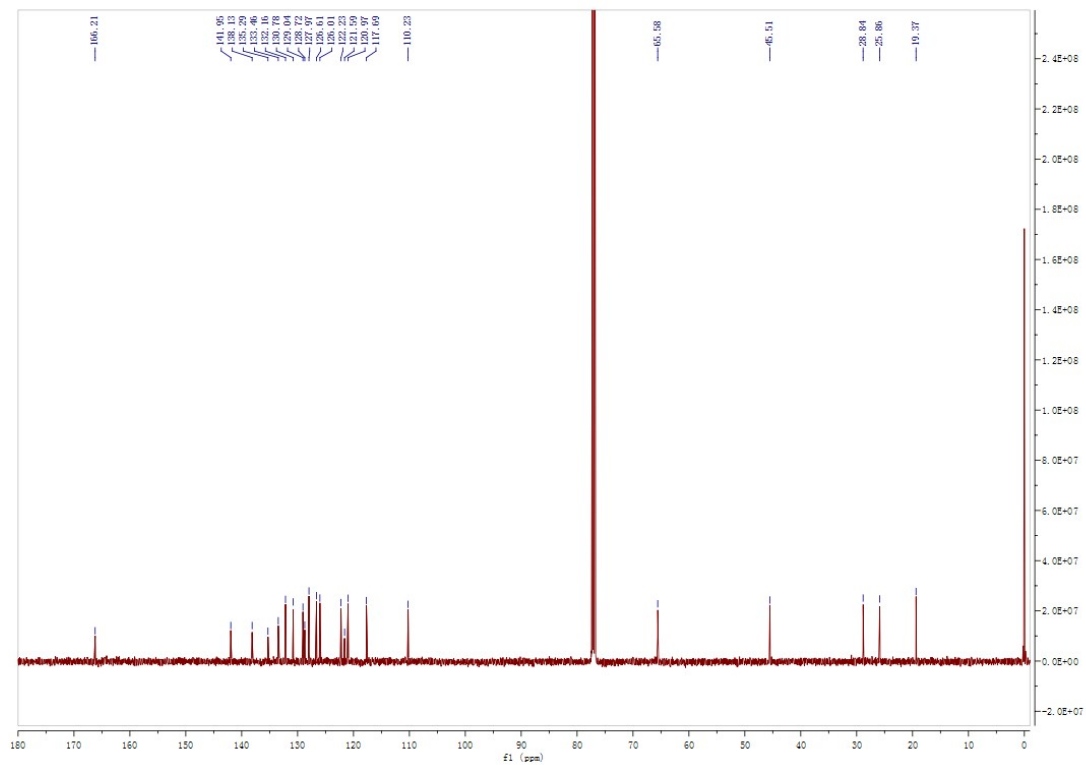

424

425 **6k**

426 **H NMR**

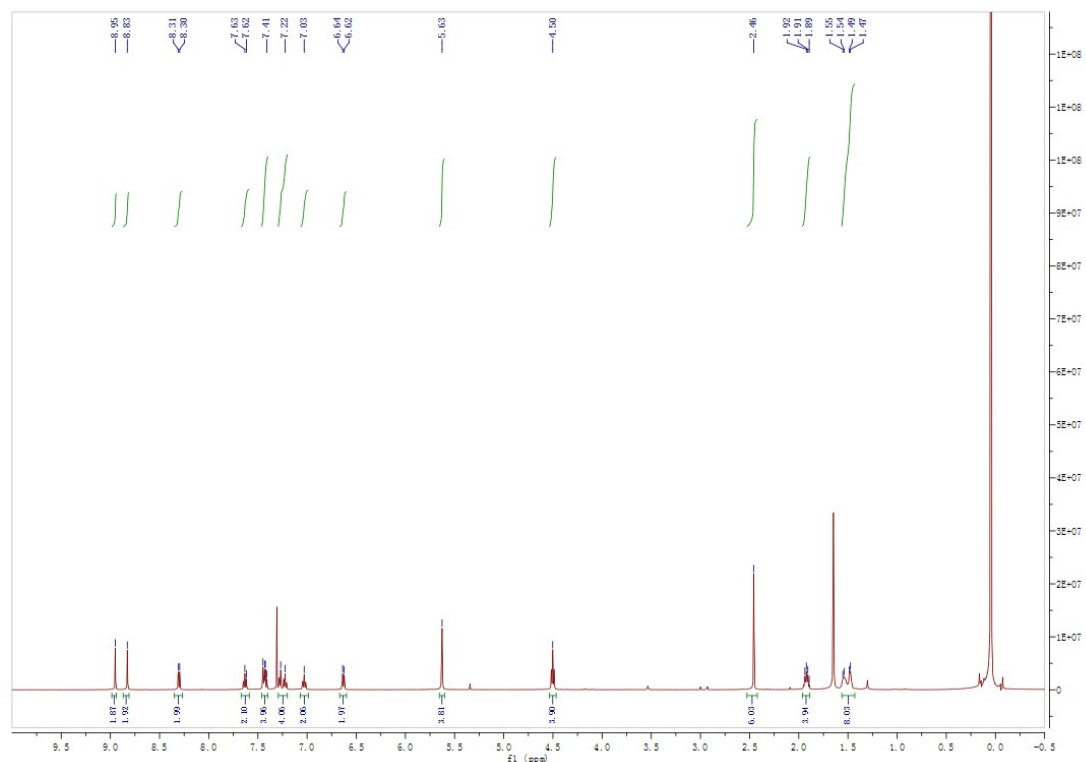

427

428 **C NMR**

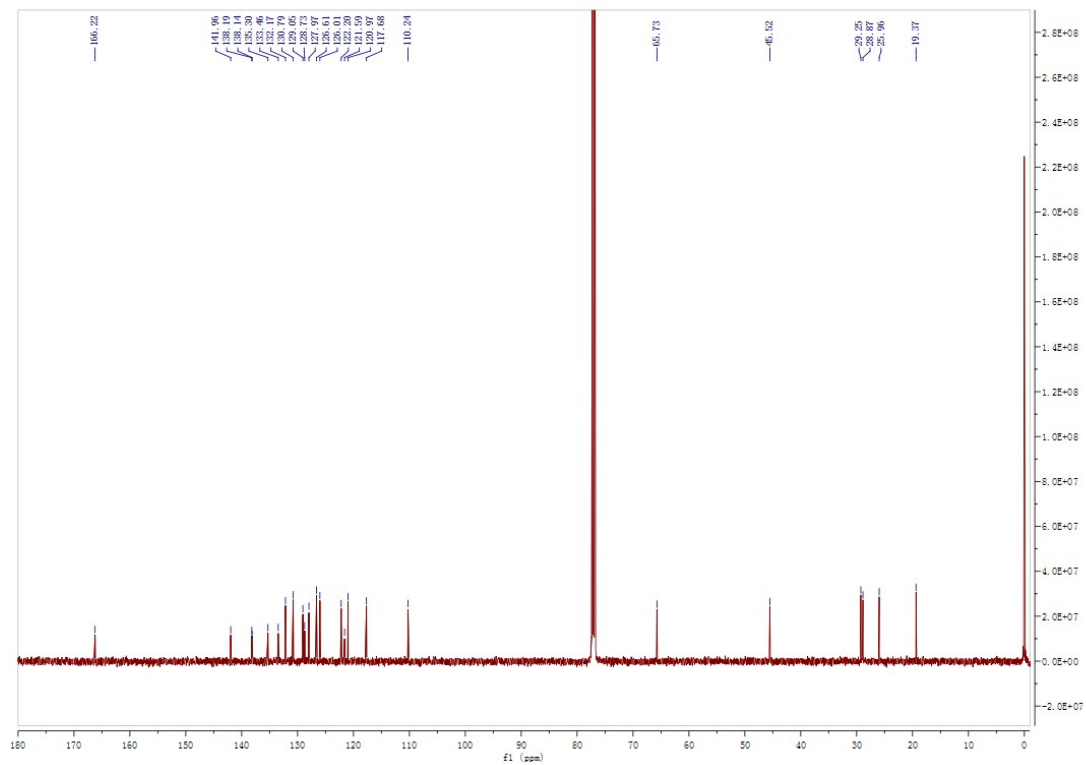

429

430 **6I**

431 <sup>1</sup>H NMR

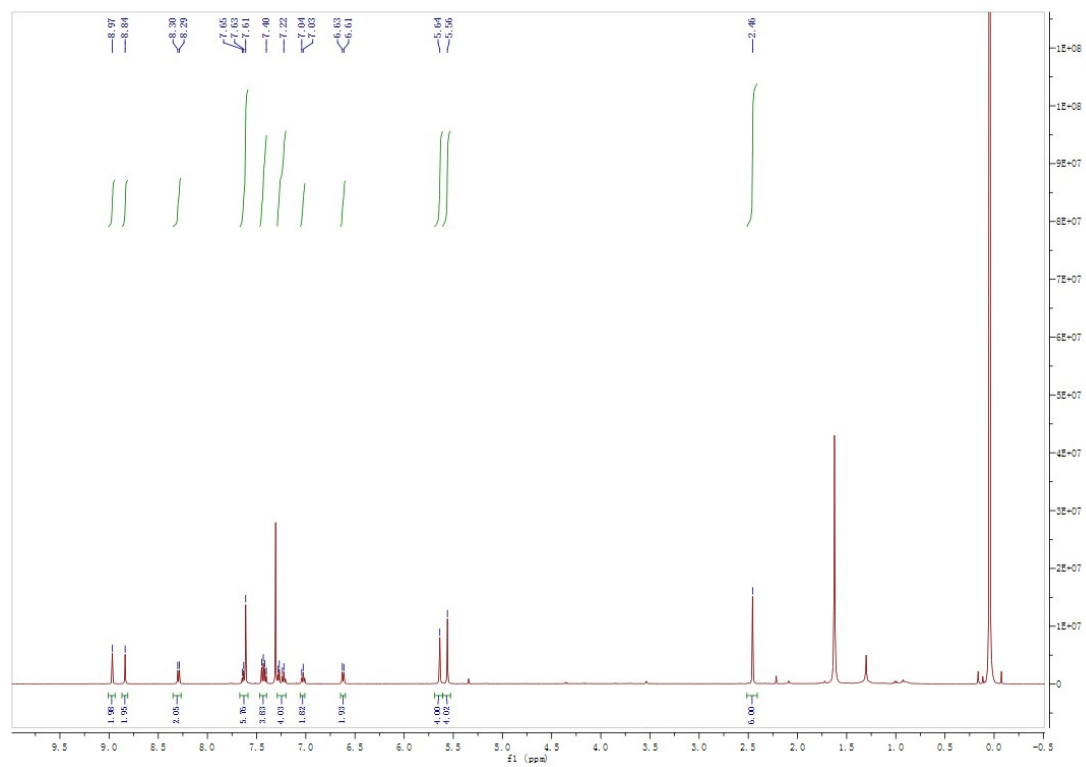

432

433 <sup>13</sup>C NMR

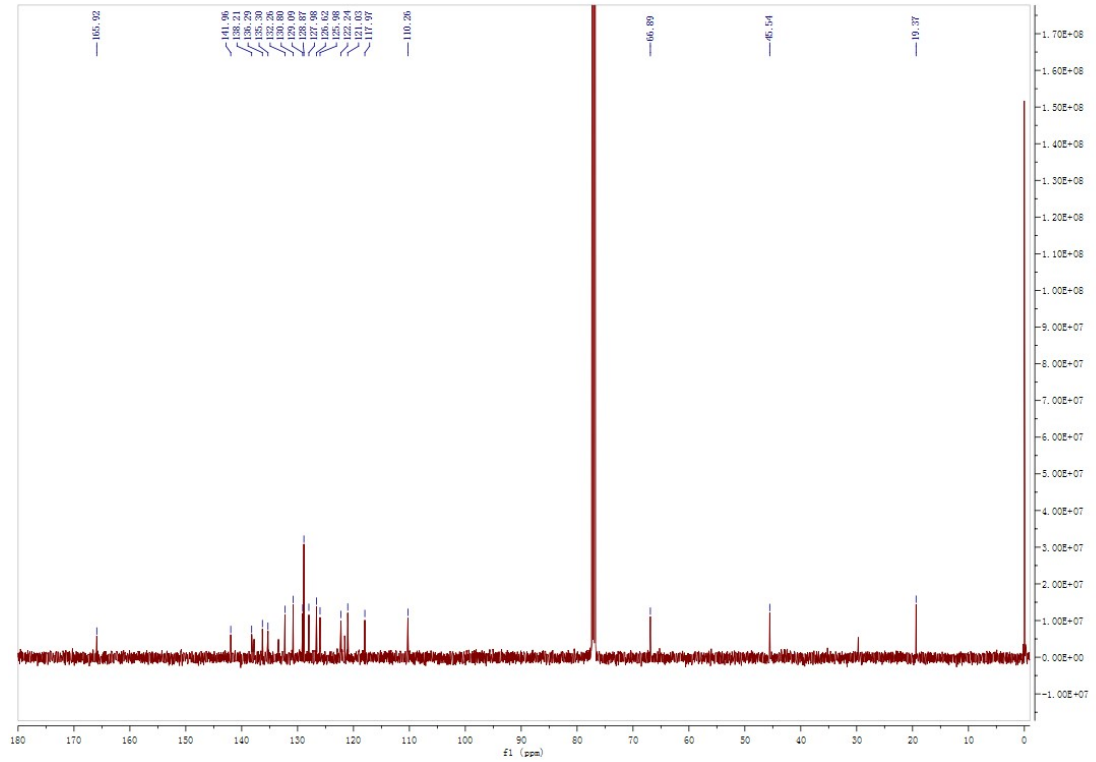

434

435 **6m**

436 **<sup>1</sup>H NMR**

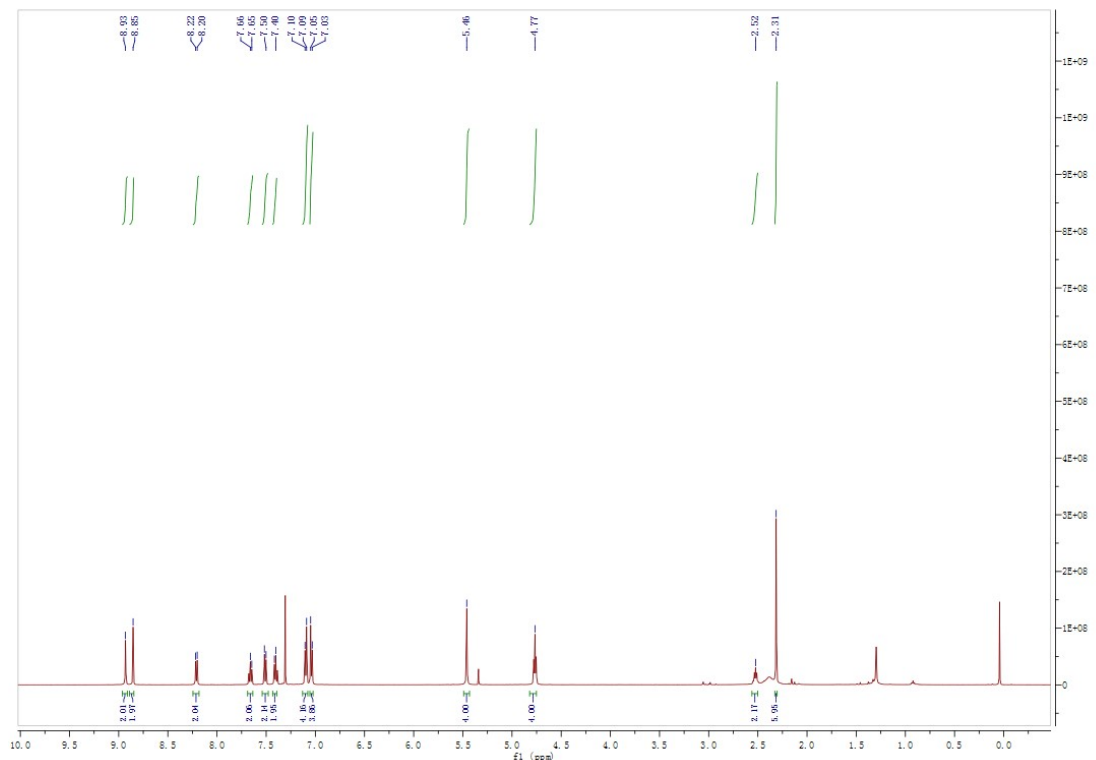

437

438 **<sup>13</sup>C NMR**

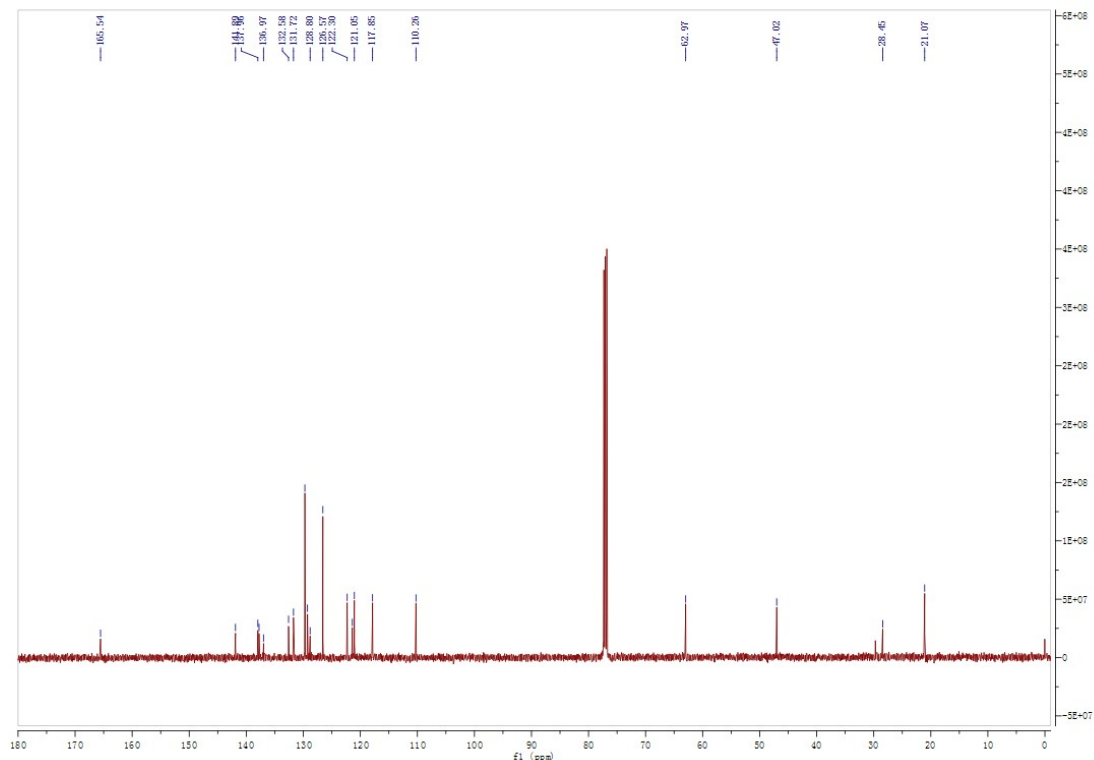

439

440 **6n**

441 <sup>1</sup>H NMR

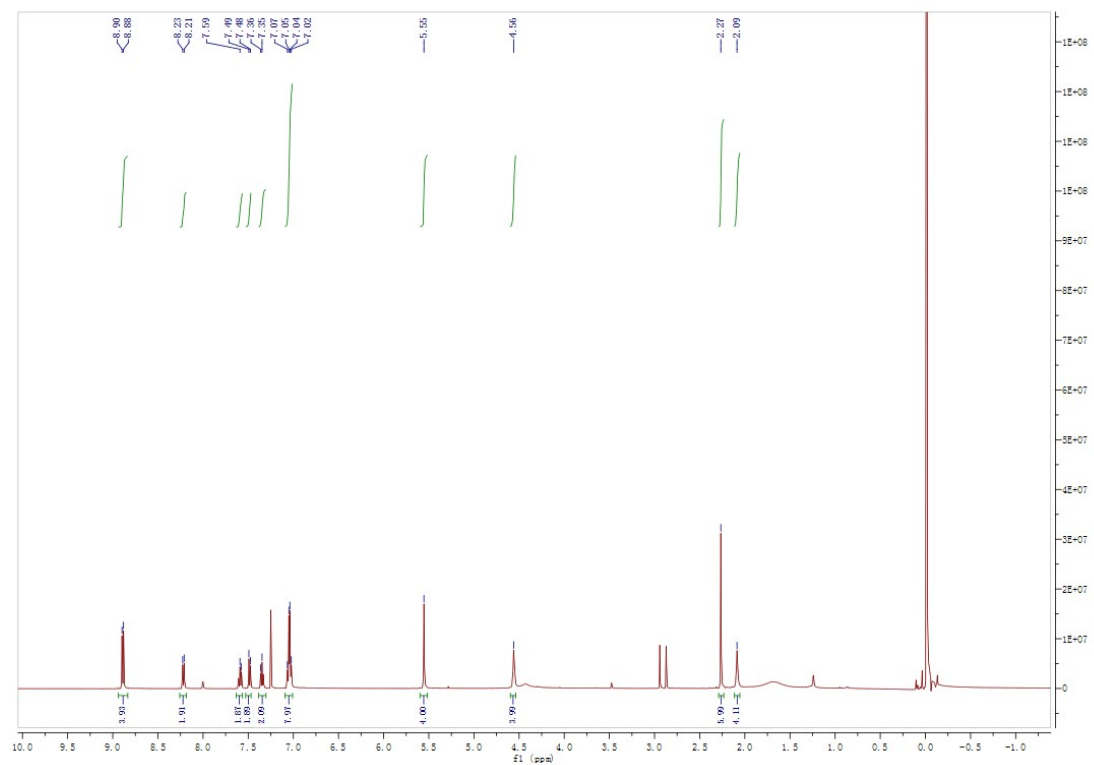

442

443 <sup>13</sup>C NMR

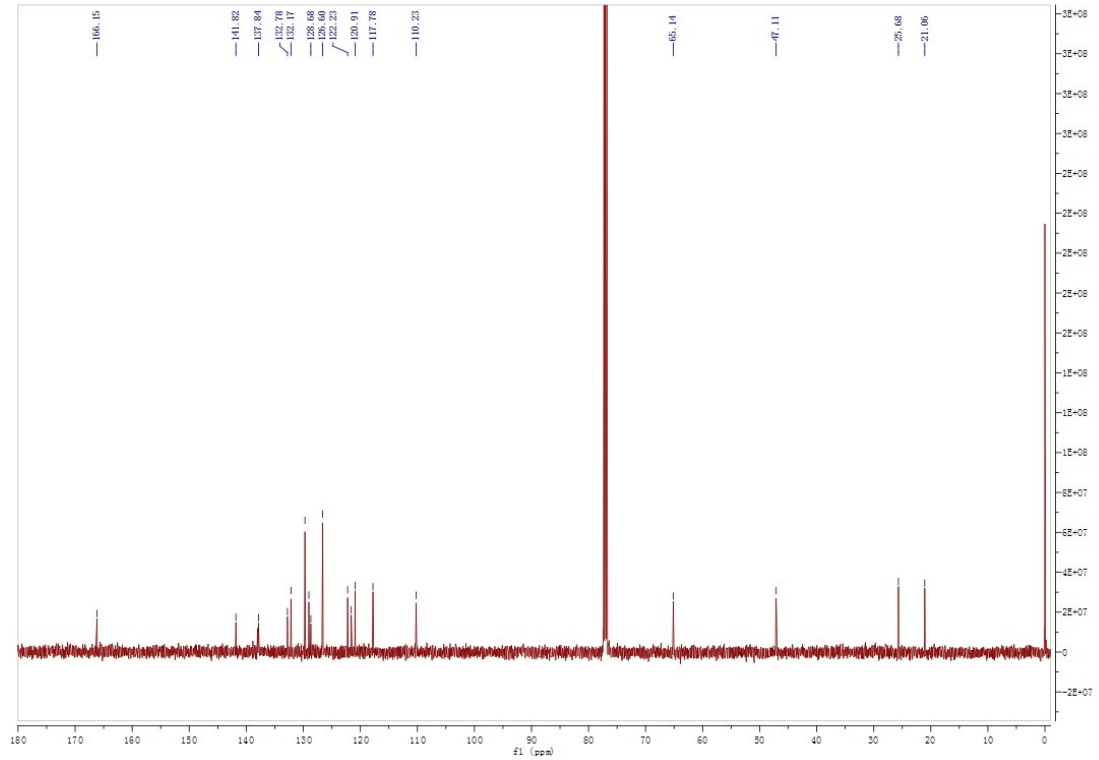

444

445 **60**

446 **1H NMR**

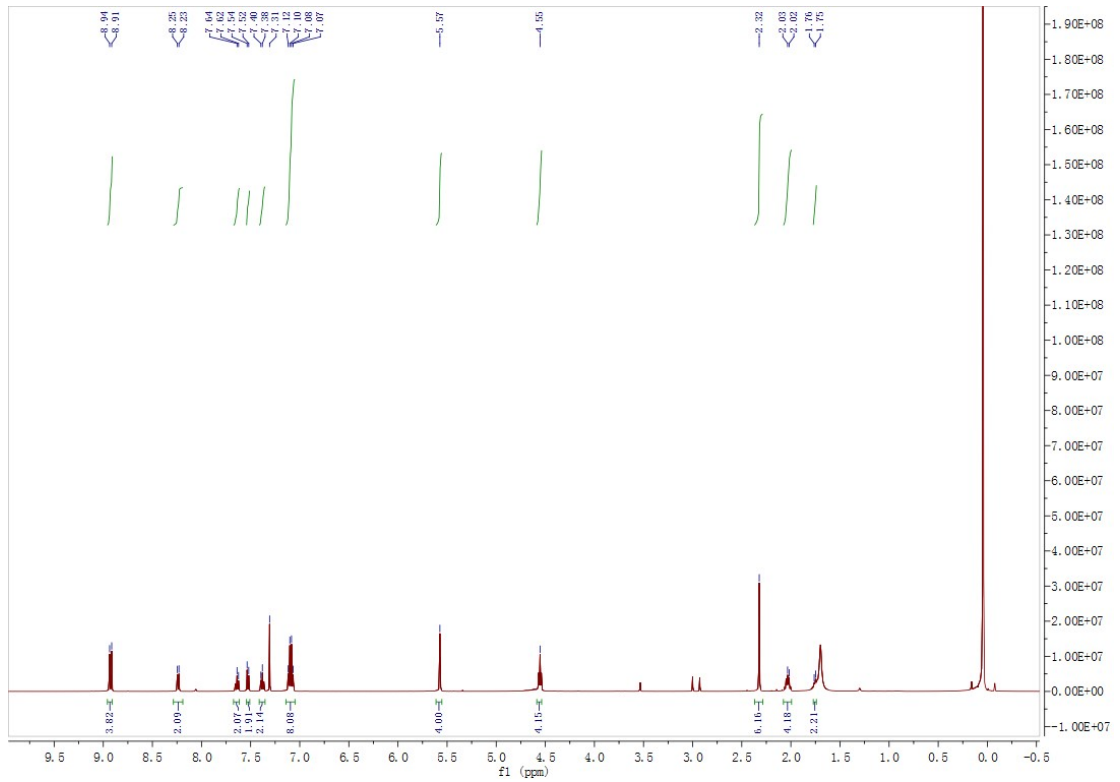

447

448 **13C NMR**



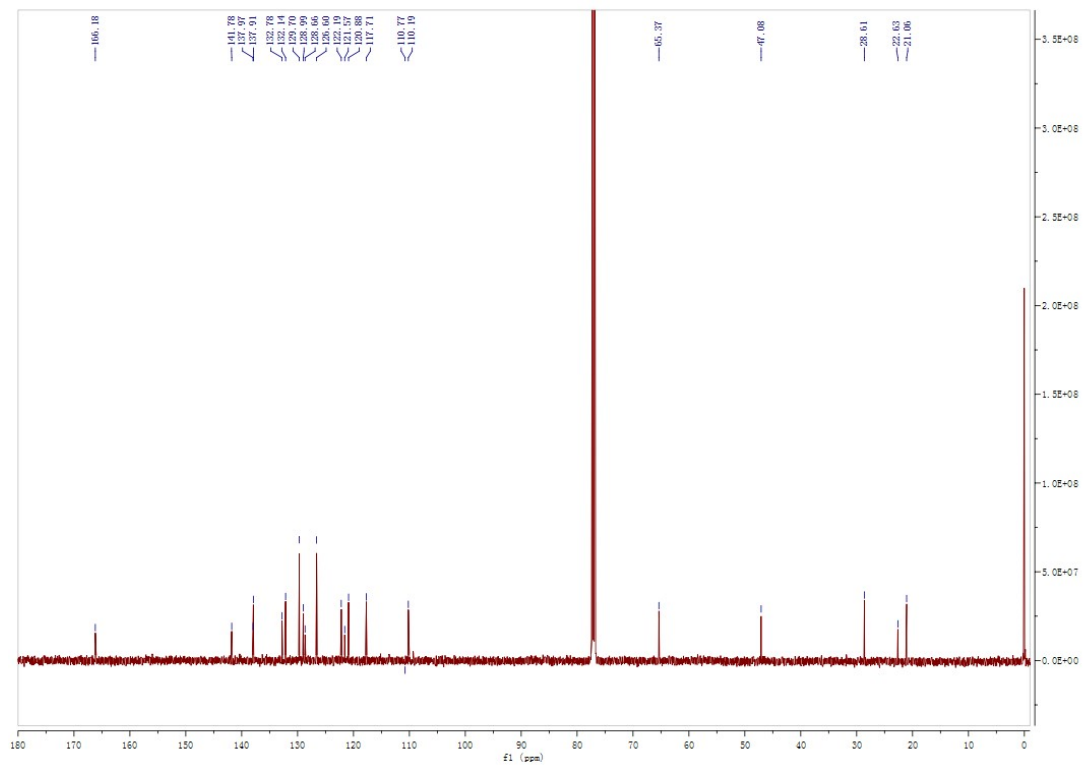

449

450 **6p**

451 **H NMR**

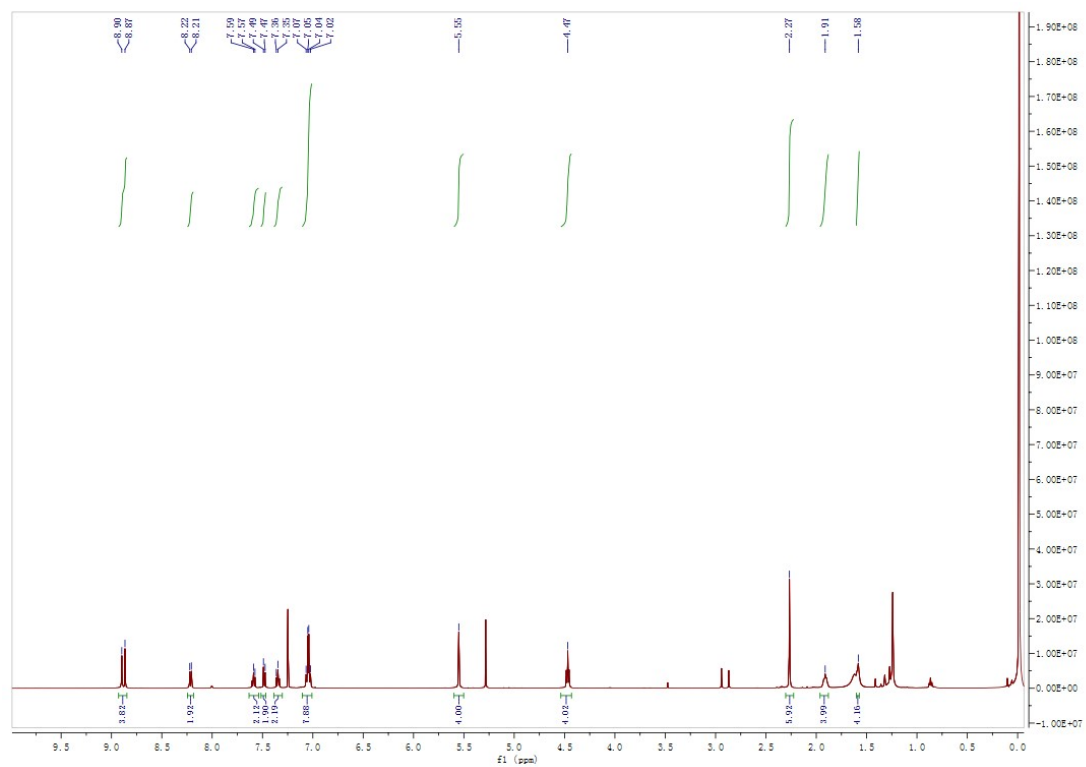

452

453 **C NMR**

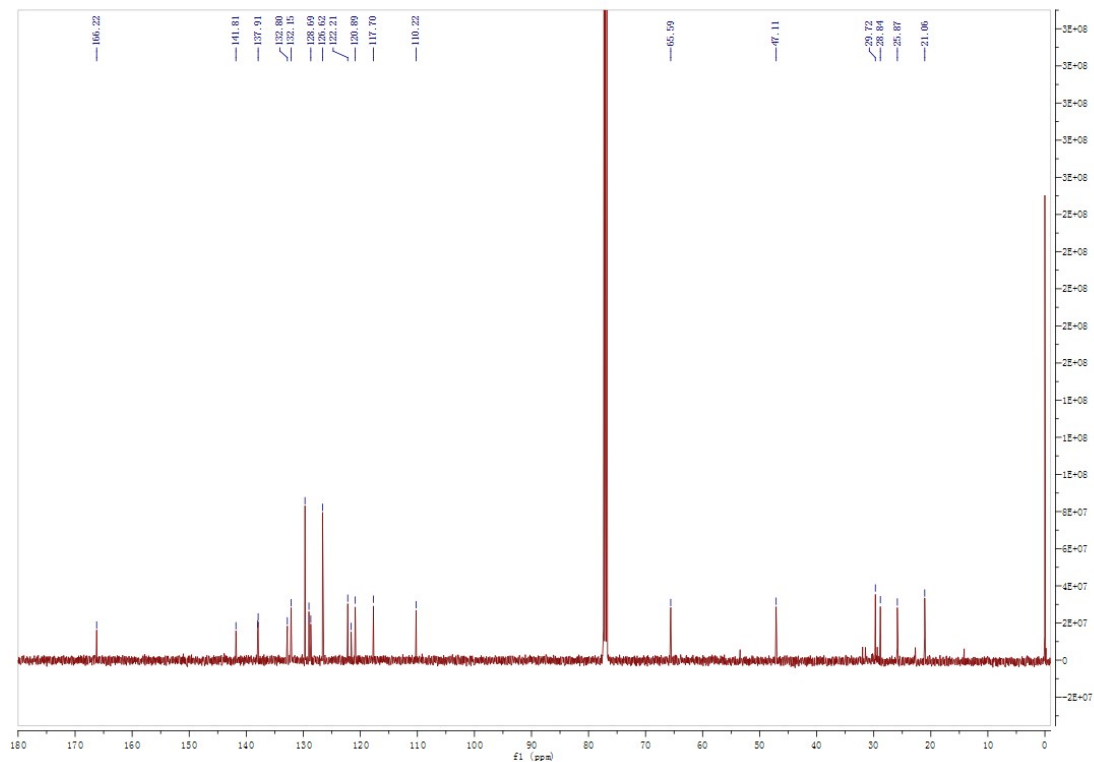

454

455 **6q**

456 **1H NMR**

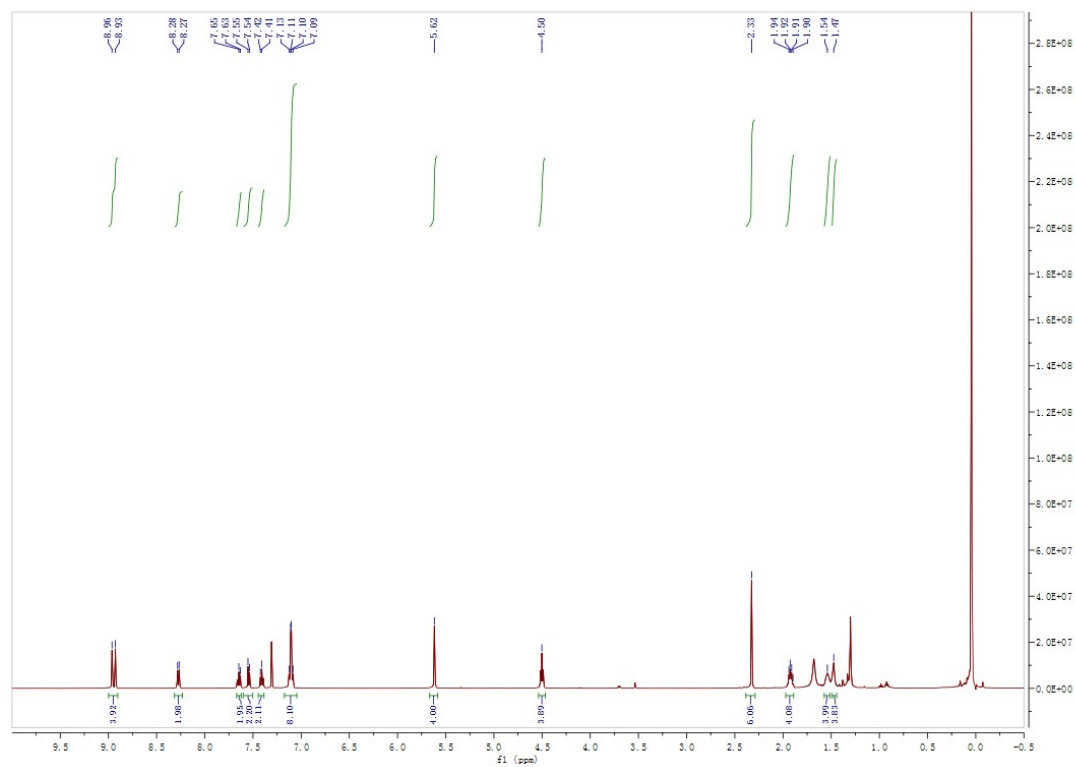

457

458 **13C NMR**

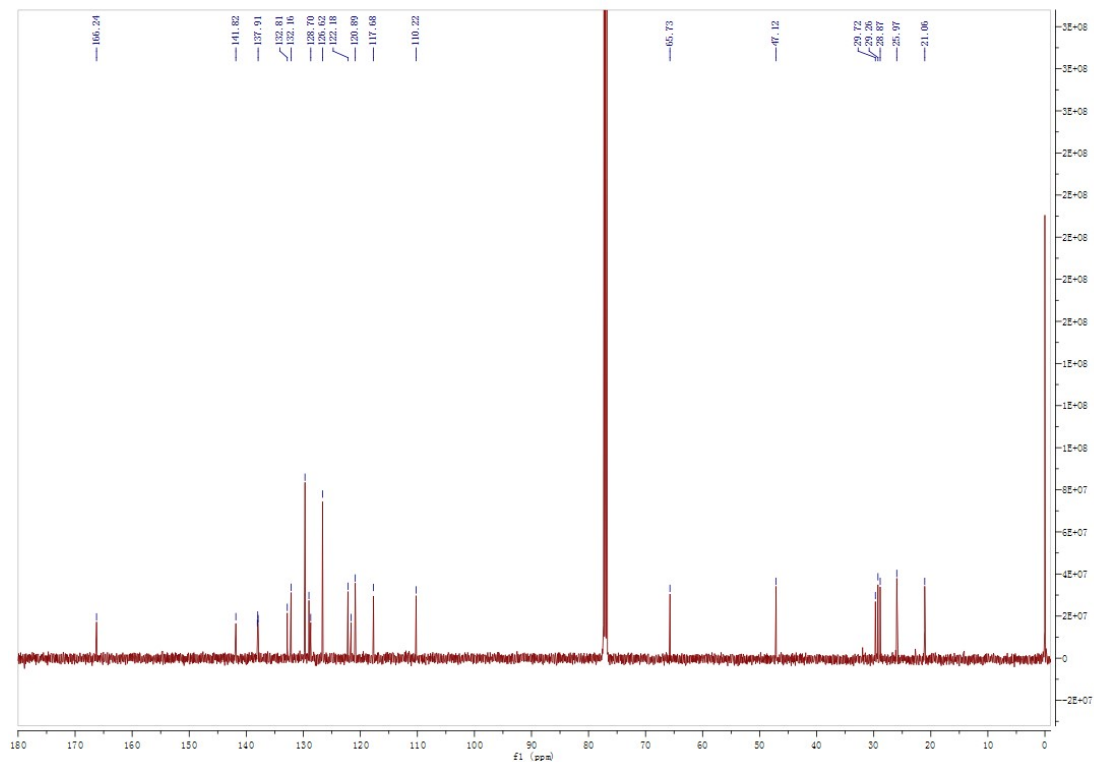

459

460 **6r**

461 <sup>1</sup>H NMR

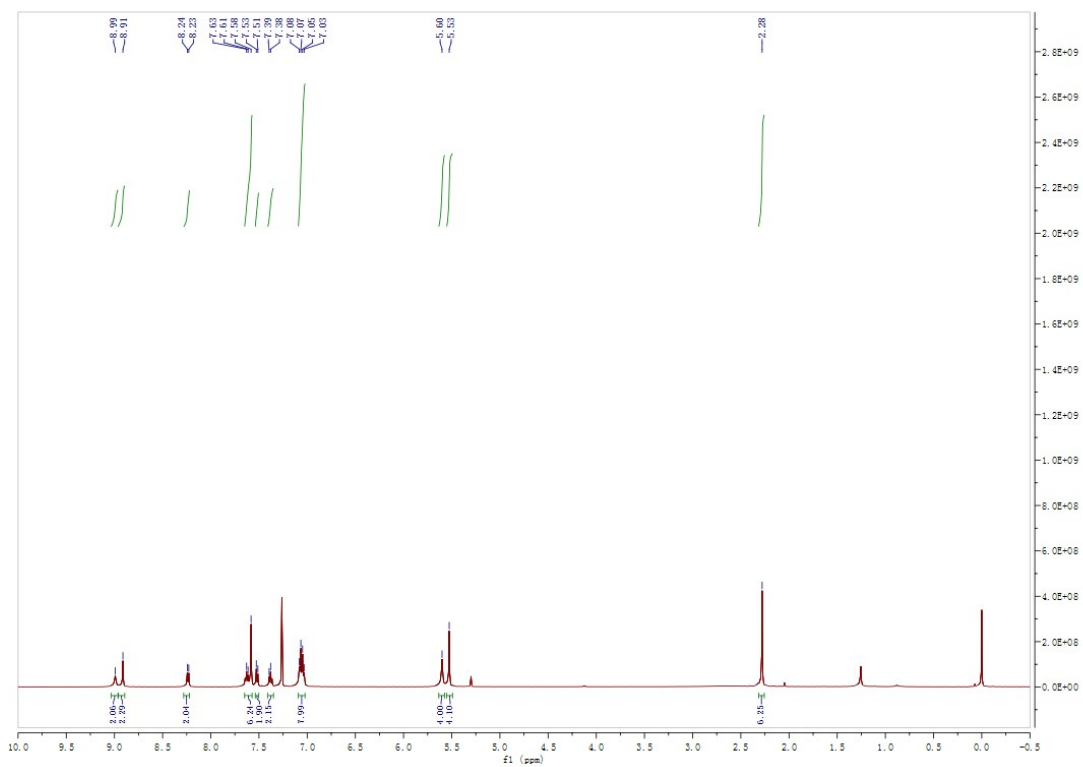

462

463 <sup>13</sup>C NMR

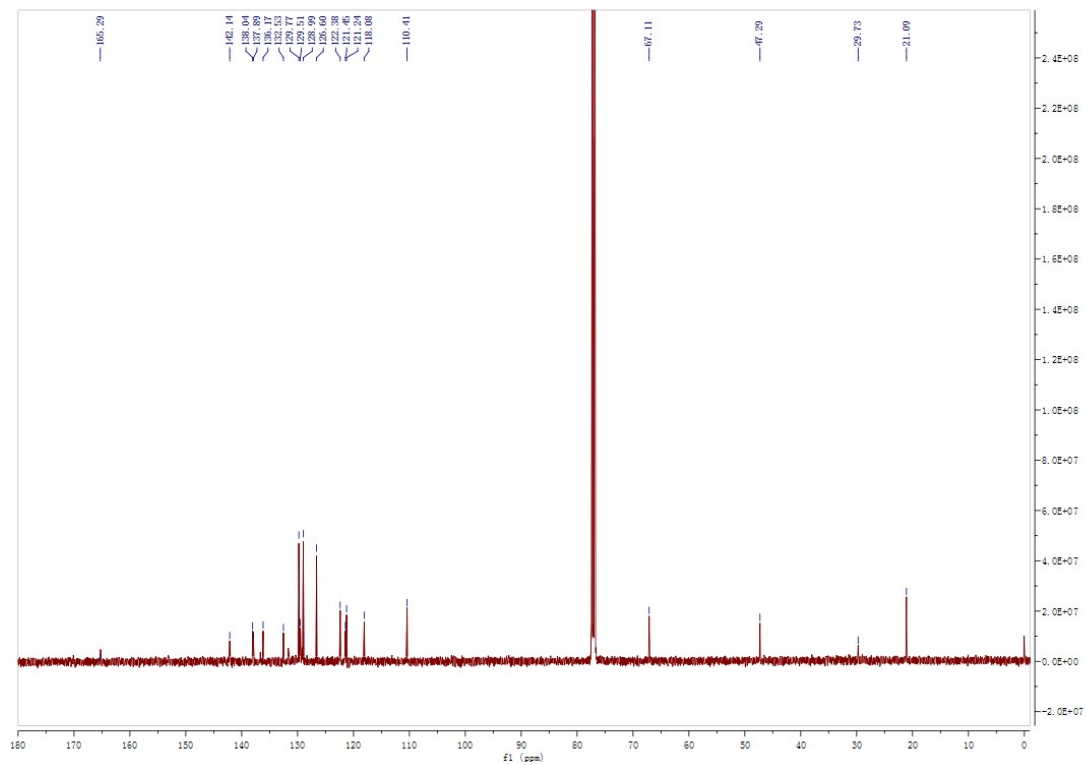

464

465 **6s**

466 **H NMR**

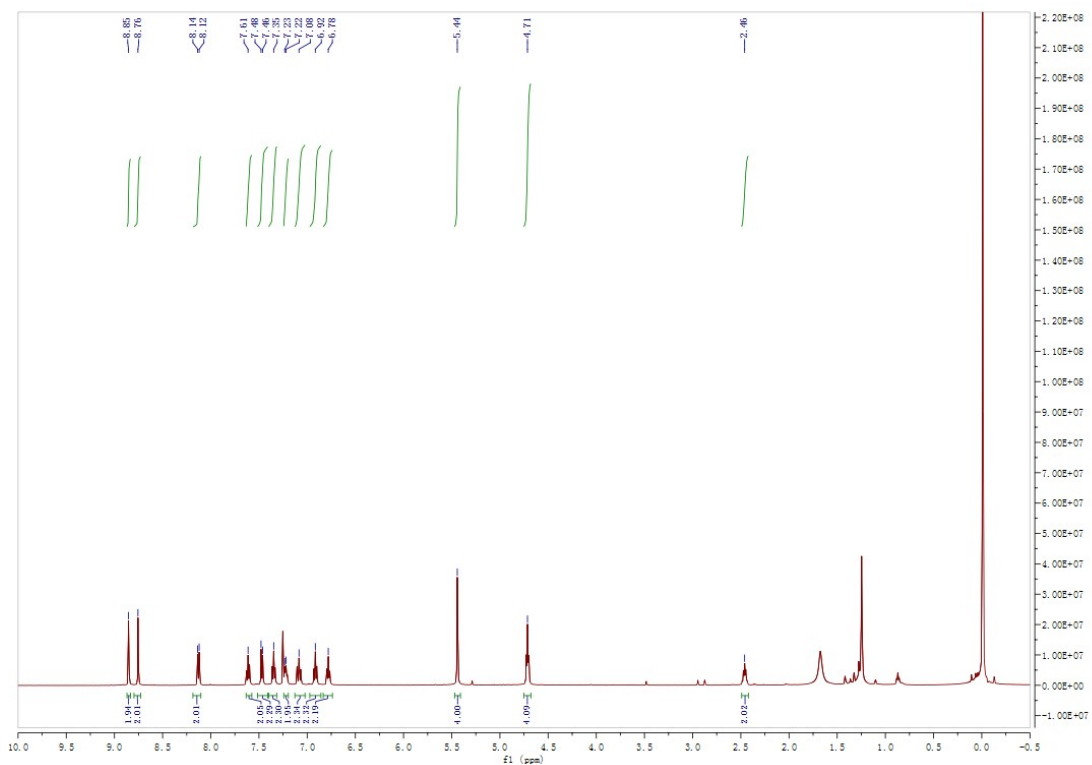

467

468 **C NMR**

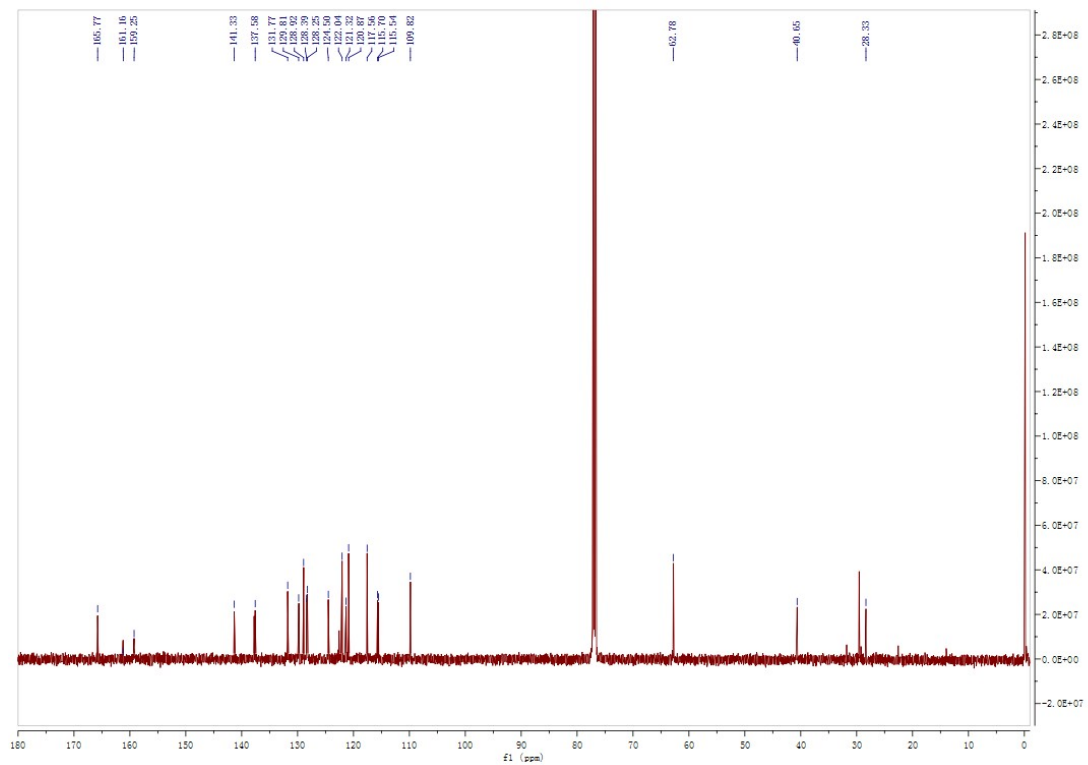

469

470 **6t**

471 <sup>1</sup>H NMR

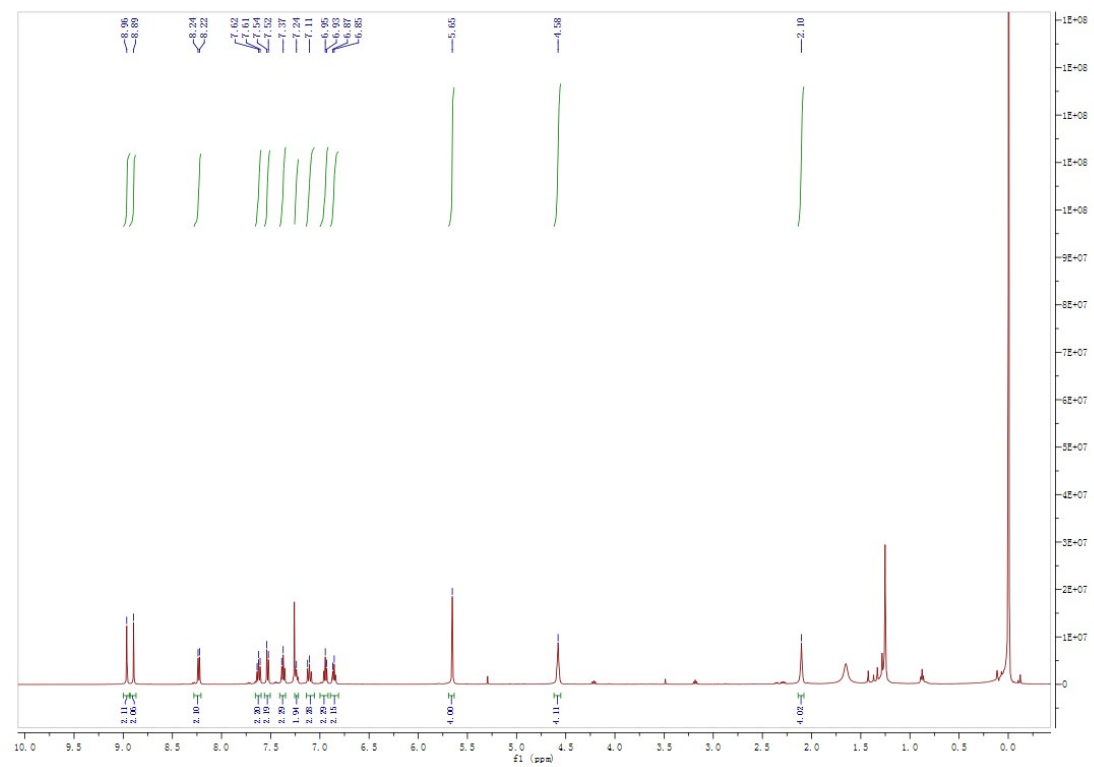

472

473 <sup>13</sup>C NMR

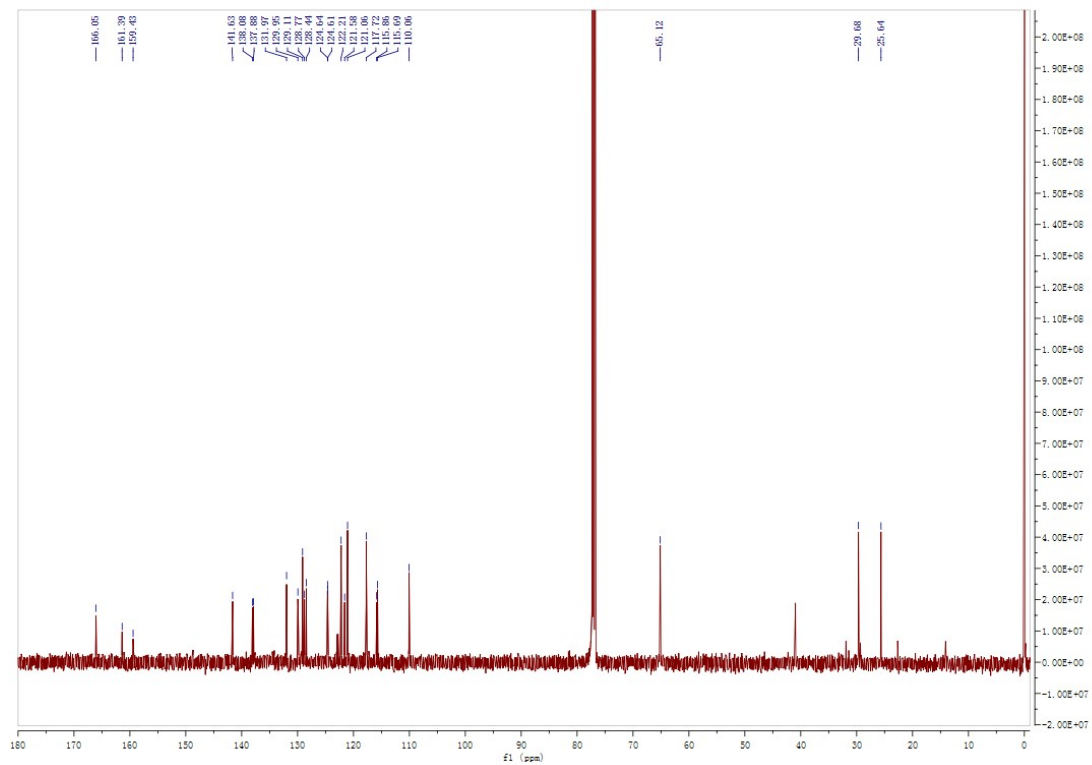

474

475 **6u**

476 <sup>1</sup>H NMR

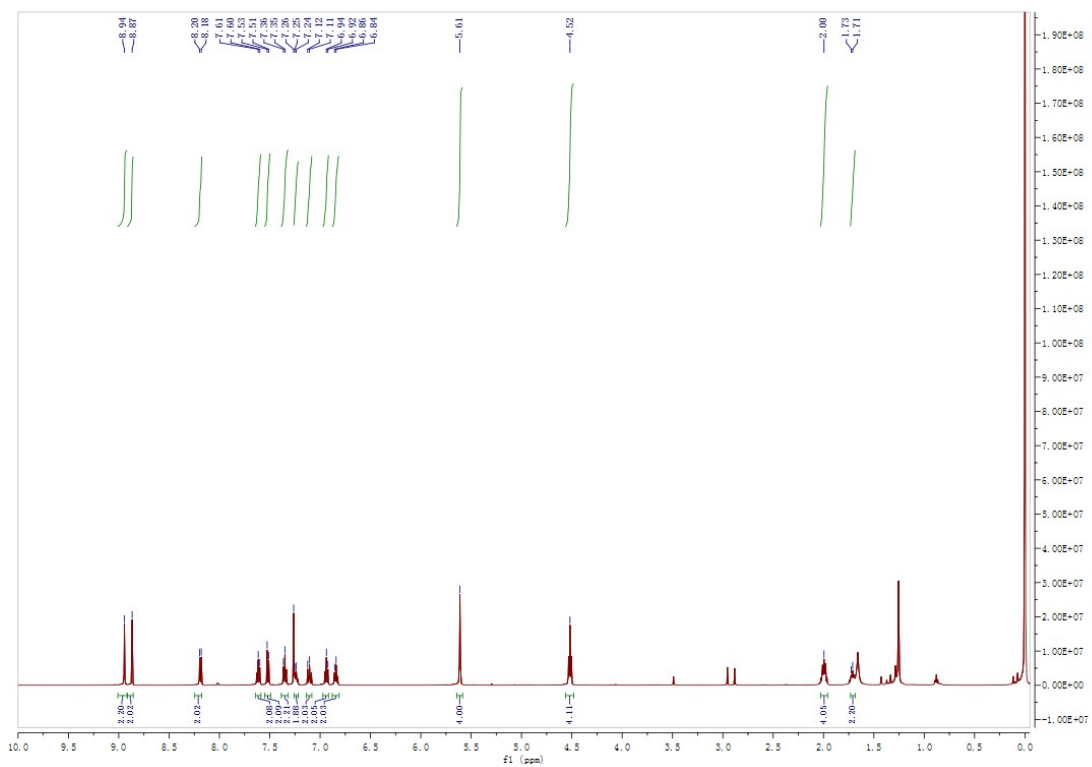

477

478 <sup>13</sup>C NMR

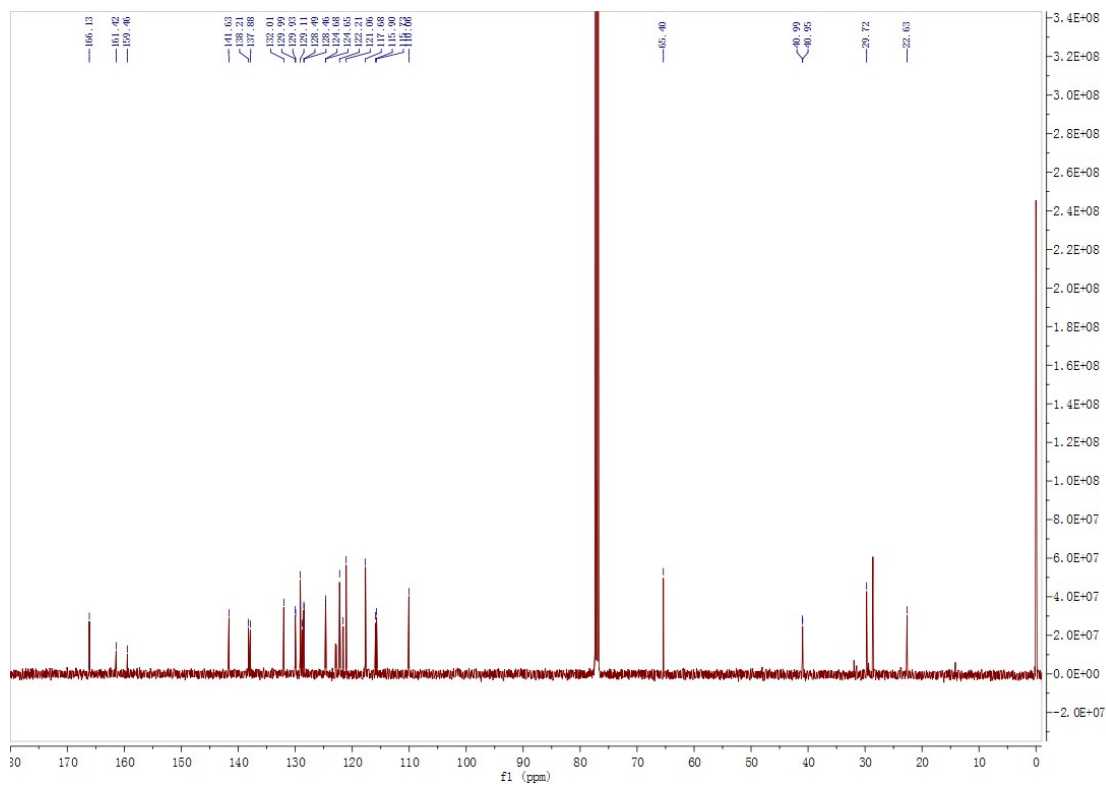

479

480 **6v**

481 **<sup>1</sup>H NMR**

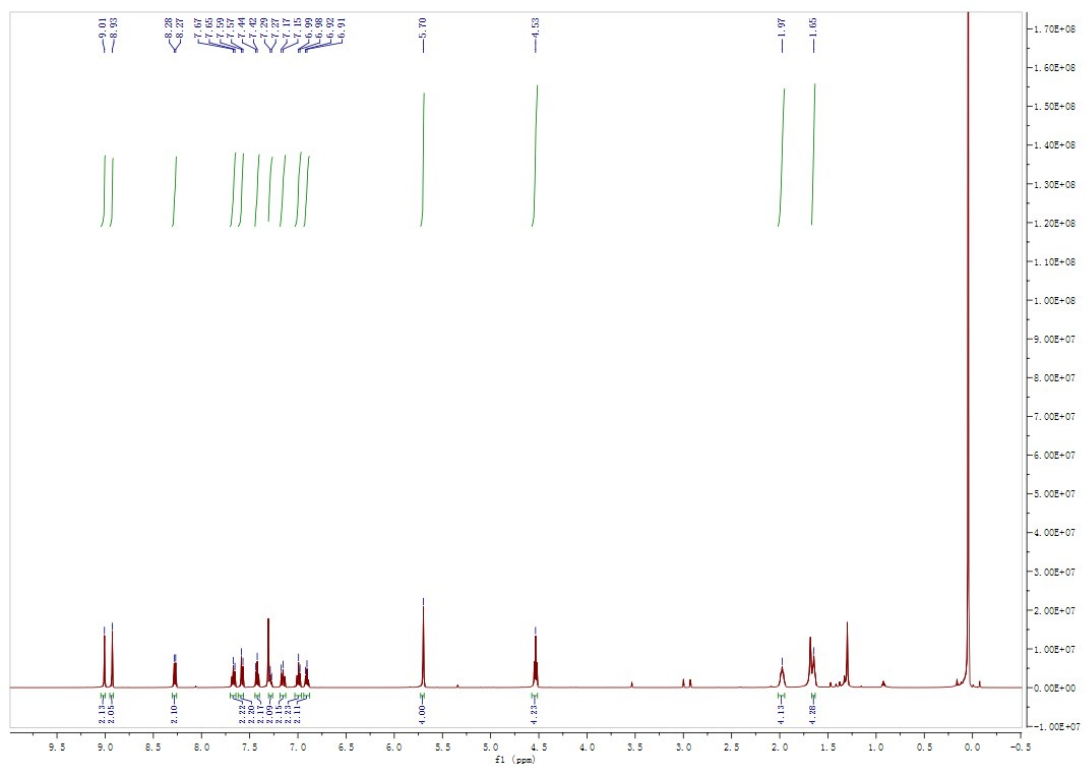

482

483 **<sup>13</sup>C NMR**

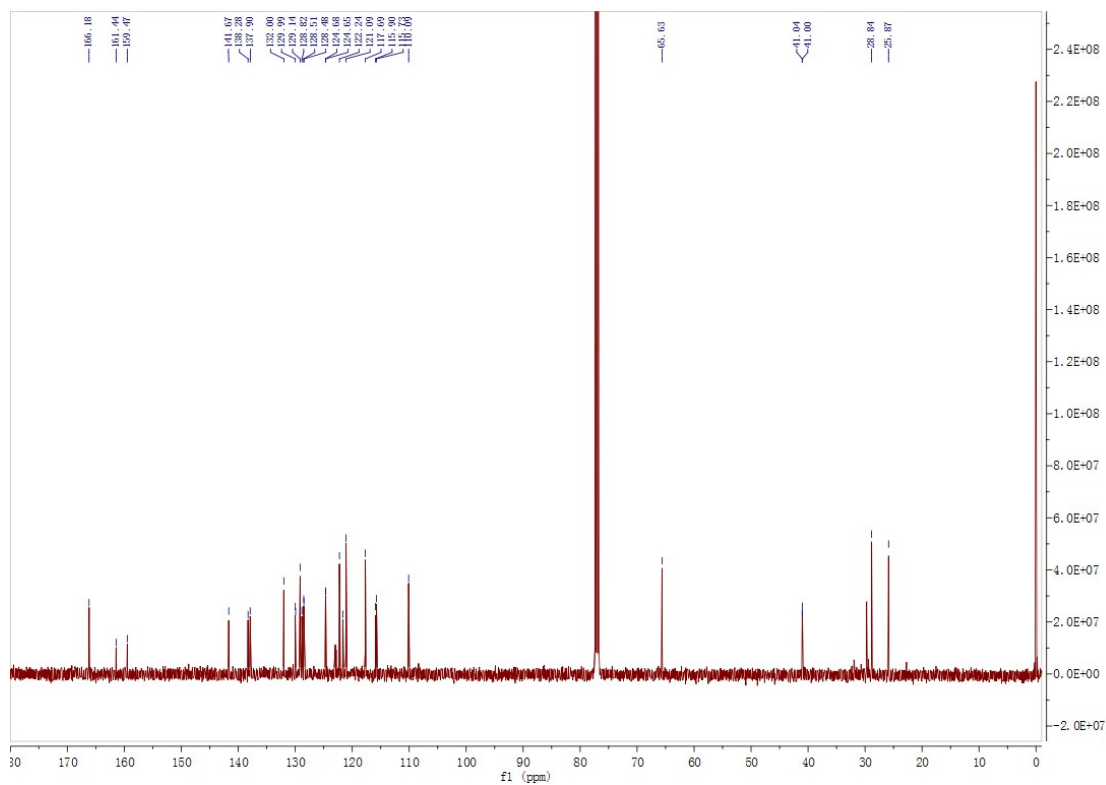

484

485 **6w**

486 **H NMR**

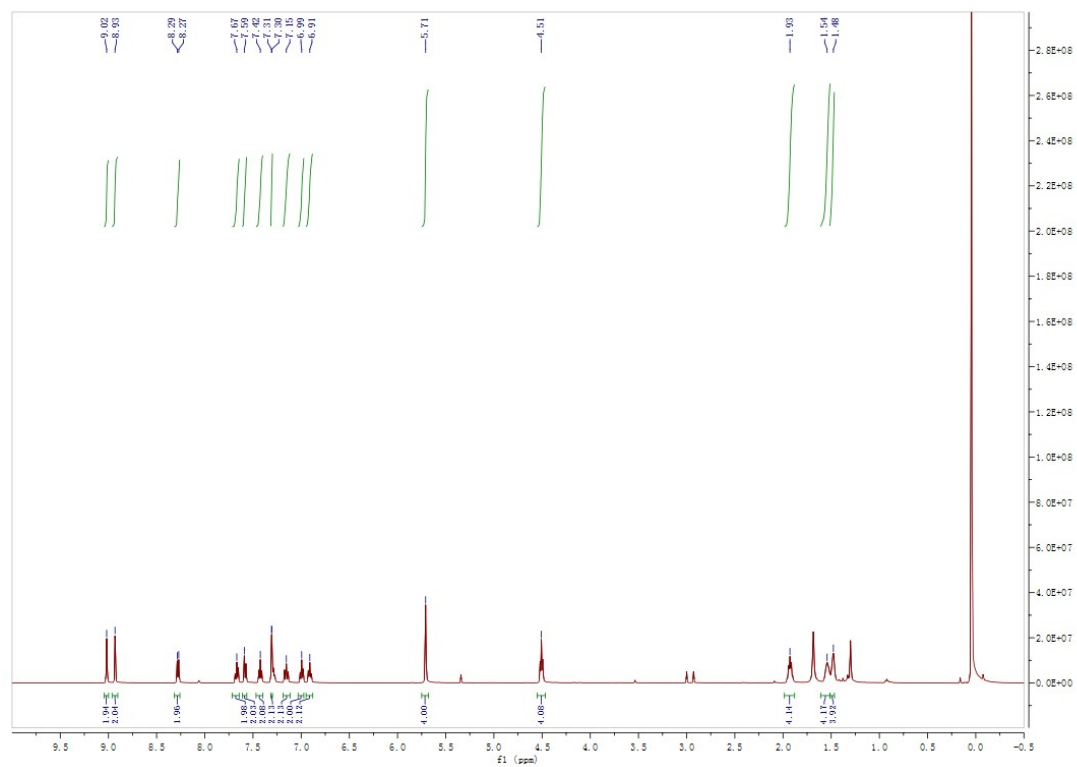

487

488 **C NMR**



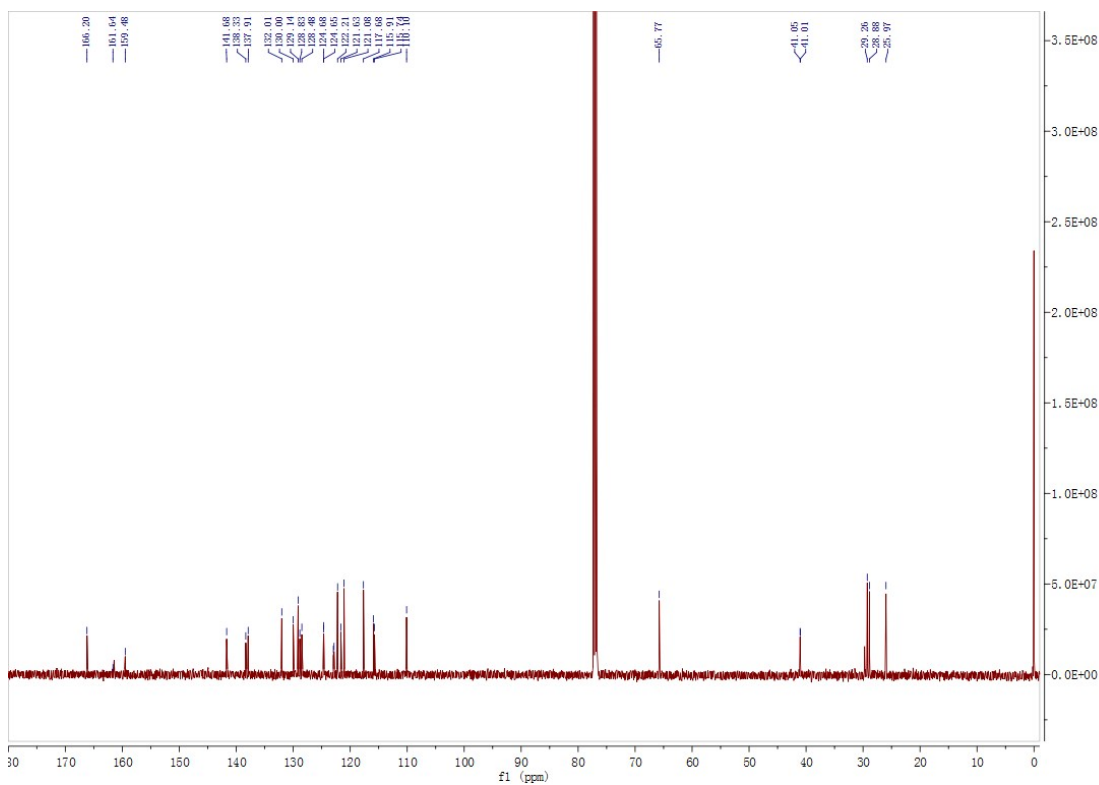

489

490 **6x**

491 **<sup>1</sup>H NMR**

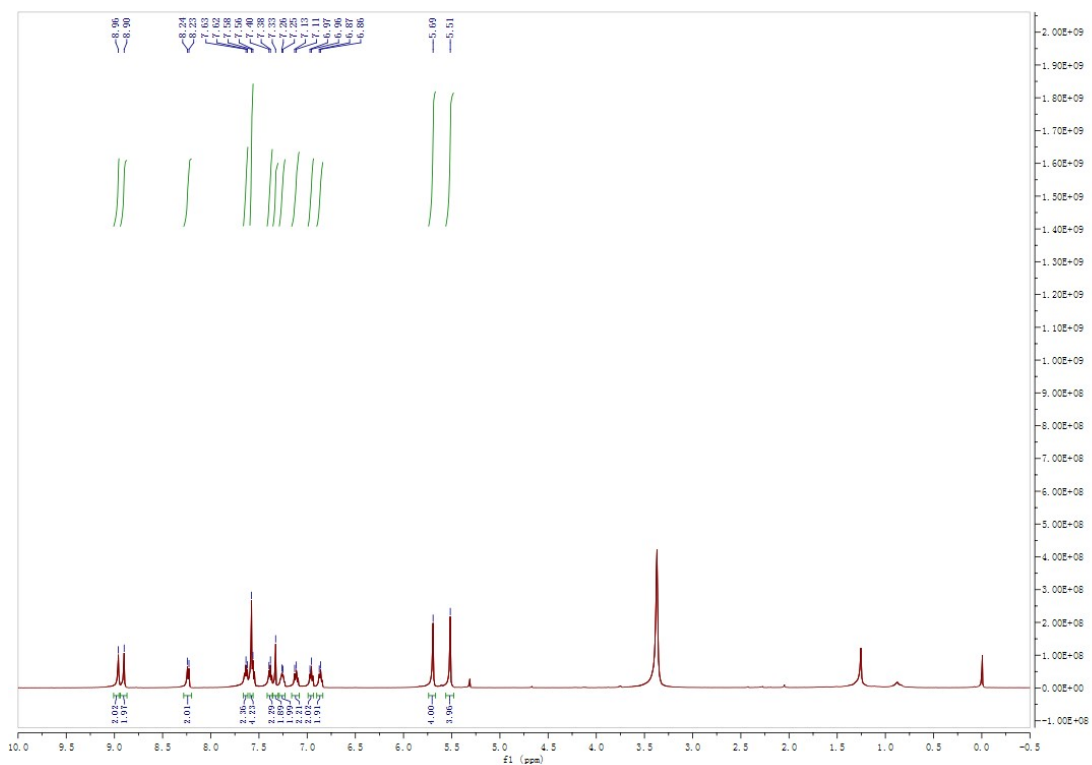

492

493 **<sup>13</sup>C NMR**

494

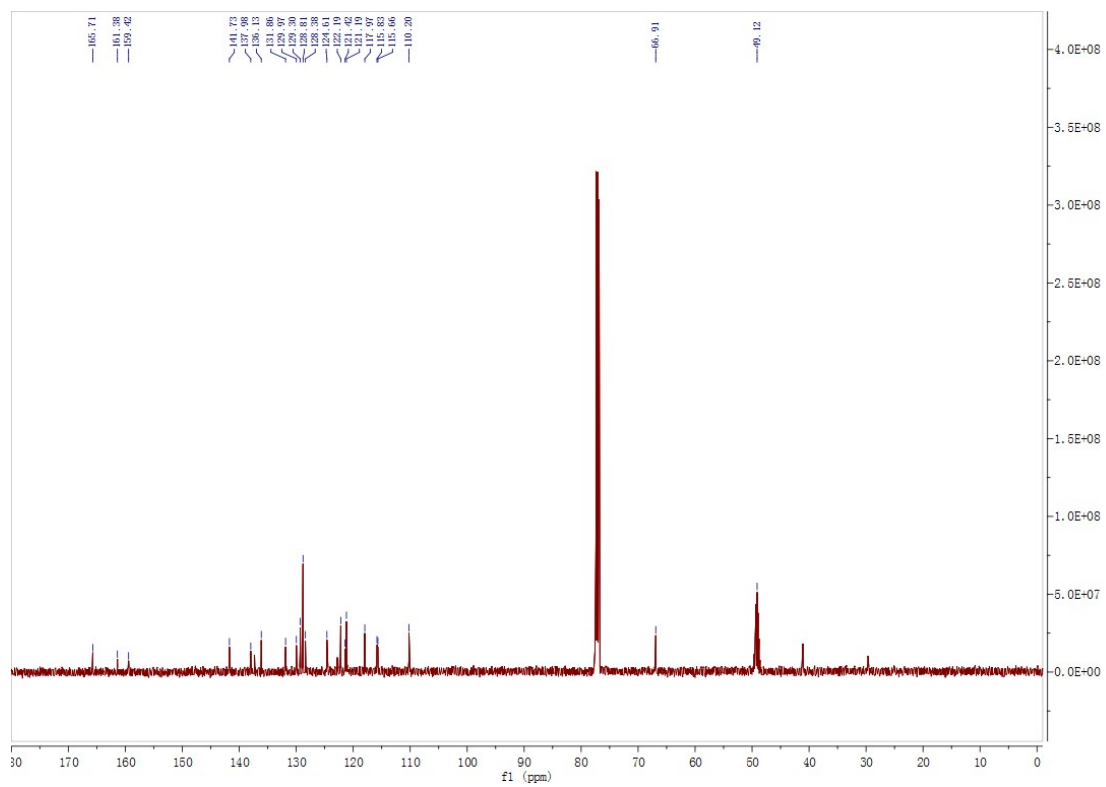

Supplement: s001 [file ijms-19-03179-s001.pdf]
